# Supplementary material for: Intramolecular iodoarylation reaction of alkynes: easy access to derivatives of benzofused heterocycles
Source: Royal Society of Chemistry journal article supplement (doi:10.1039/b500303b), 2005-01-01

***Electronic Supplementary Information (ESI):***

José Barluenga,\* Mónica Trincado, María Marco-Arias, Alfredo  
Ballesteros, Eduardo Rubio and José M. González

*Instituto Universitario de Química Organometálica "Enrique Moles"-Unidad  
Asociada al C.S.I.C., Universidad de Oviedo; Julián Clavería, 8; 33006  
Oviedo Spain*

*Contents*

Experimental procedures and characterization data of all  
compounds. Copies of the spectra of compounds **2**, **4**, **6** and **8**.

**Experimental section:**

**General:** All reactions were conducted using oven-dried glassware under an atmosphere of nitrogen. Dichloromethane was distilled before used from P<sub>2</sub>O<sub>5</sub>, and DMF was distilled from MgSO<sub>4</sub>. The solvents used in column chromatography, hexane and ethyl acetate, were obtained from commercial suppliers and used without further distillation. TLC was performed on aluminium-backed plates coated with silica gel 60 with F<sub>254</sub> indicator (Merck). Flash chromatography was carried out on neutral, activated aluminium oxide (50-200 micron). NMR spectra were measured at room temperature on a Bruker AC-200 MHz or Bruker DPX-300 MHz spectrometers. 2D NMR experiments were recorded on a Bruker AMX-400 MHz. Chemical shifts are reported in ppm with the solvent resonance as the internal standard (deuteriochloroform:  $\delta$  7.26 ppm in <sup>1</sup>H spectra,  $\delta$  77.00 ppm in <sup>13</sup>C spectra). Carbon multiplicities were assigned by DEPT techniques and/or phase-sensitive HSQC experiments. Infra-red spectra was obtained on a Unicam Mattson 3000 FTIR spectrometer. Elemental analyses were carried out on a Perkin-Elmer 2400 and Carlo Erba 1108 microanalyzers. Melting point were measured on a Büchi-Totoli apparatus and were not corrected.

**Starting materials:** Propargyl ethers and sulphonamides were prepared according to web established methods: a) Tietze, L.

F.; Fischer, T. in *Reactions and Synthesis in the Organic Chemistry Laboratory*, University Science Books: Mill Valley, CA, 1989. b) Manhas, M. S.; Hoffman, W. H.; Lal, B.; Bose, A. *K. J. Chem. Soc. Perkin Trans. I* 1975, 461.

All commercially available compounds were used as received.

**General procedure for the synthesis of iodochromenes and dihydroquinolines 2 using IPy<sub>2</sub>BF<sub>4</sub> and HBF<sub>4</sub>:** IPy<sub>2</sub>BF<sub>4</sub> (1 mmol, 372 mg, 1 equiv.) is stirred in dichloromethane (10 ml) at room temperature under nitrogen atmosphere for 5 minutes until a homogeneous solution is obtained. The solution was then cooled to -40 °C and HBF<sub>4</sub> (a commercially available 54% ethereal solution was used; for the amount added see in each case, see Schemes 2 and 4) was added. After stirring the mixture for ten additional minutes, the mixture was cooled to -80 °C and the corresponding substrate **1** was added (-85 °C for **1j**). The reaction was monitored by tlc until disappearance of **1** (see Schemes 2 and 4 for reaction times). The reaction mixture was poured onto crushed ice/water, sodium tiosulfate (5% aqueous solution, 20 ml) was added, and the product was extracted from dichloromethane (20 ml, three times). The combined organic layers were washed with water and dried over sodium sulfate. After removing the solvents under reduced pressure, the crude was subjected to purification through a column of silica gel, first with hexanes to remove the traces of starting material and then with a mixture of hexanes/ethyl acetate.

**Spectroscopic data of compounds 2:**

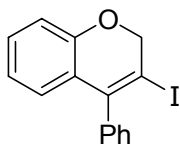

**3-Iodo-4-phenyl-2H-chromene. 2a** Yellow solid.

Melting point = 80-82 °C.  $R_f$  = 0.79 (Hexane: EtOAc, 3:1).  $^1\text{H-NMR}$  ( $\text{CDCl}_3$ , 300 MHz): 7.57-7.48 (m, 3H), 7.28-7.18 (m, 3H), 6.92 (dd,  $J$  = 7.9, 1.3 Hz, 1H), 6.83 (td,  $J$  = 7.4, 1.3 Hz, 1H), 6.71 (dd,  $J$  = 7.7, 1.8 Hz, 1H), 5.13 (s, 2H).

$^{13}\text{C-NMR}$  ( $\text{CDCl}_3$ , 75 MHz): 153.4 (C), 142.0 (C), 140.1 (C), 129.8 (CH), 129.6 (CH), 128.8 (CH), 128.4 (CH), 126.6 (CH), 124.3 (C), 121.8 (CH), 116.2 (CH), 91.4 (C), 75.2 ( $\text{CH}_2$ ) IR ( $\text{CH}_2\text{Cl}_2$ ,  $\text{cm}^{-1}$ ) 3057, 2925, 2833, 1950, 1650, 1596, 1480, 1452, 1224, 756, 699. HRMS (IE) Calcd for  $\text{C}_{15}\text{H}_{11}\text{IO}$  (M+H) 333.9857, Found 333.9854. Anal. Calcd for  $\text{C}_{15}\text{H}_{11}\text{IO}$ : C, 53.41%; H, 3.52%, Found: C, 53.91%; H, 3.32%.

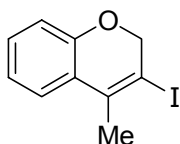

**3-Iodo-4-methyl-2H-chromene 2b.** Yellow oil.  $R_f$  =

0.80 (hexanes/ethyl acetate : 50/1).  $^1\text{H-NMR}$  ( $\text{CDCl}_3$ , 200 MHz): 7.25-7.15 (m, 2H), 6.95 (td,  $J$  = 15.1, 1.3 Hz, 1H), 6.81 (dd,  $J$  = 8.4, 0.8 Hz, 1H), 4.90 (c,  $J$  = 1.8 Hz, 2H), 2.25 (t,  $J$  = 1.8 Hz, 3H).  $^{13}\text{C-NMR}$

( $\text{CDCl}_3$ , 75 MHz): 153.3 (C), 134.8 (C), 129.3 (CH), 123.8 (CH), 123.4 (C), 121.6 (CH), 115.9 (CH), 90.8 (C), 74.7 ( $\text{CH}_2$ ), 22.1 ( $\text{CH}_3$ ). IR ( $\text{CH}_2\text{Cl}_2$ ,  $\text{cm}^{-1}$ ) 3061, 2961, 2832, 1629, 1599, 1571, 1485, 749. EM (IE, m/z): 272 (M+), 145 (M+-I),

115, 91. HRMS (IE) Calcd for C<sub>10</sub>H<sub>9</sub>IO (M+) 271.9699, Found 271.9698.

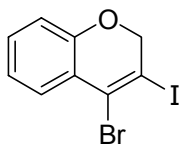

**4-Bromo-3-iodo-2H-chromene. 2c.** Yellow oil.  $R_f = 0.79$  (Hexane: EtOAc, 3:1). <sup>1</sup>H-NMR (CDCl<sub>3</sub>, 300 MHz): 7.48 (dd,  $J = 7.7, 1.6$  Hz, 1H), 7.24 (td,  $J = 8.9, 1.41$  Hz, 1H), 6.98 (t,  $J = 7.7$  Hz, 1H), 6.75 (d,  $J = 8.4$  Hz, 1H), 4.95 (s, 2H).

<sup>13</sup>C-NMR (CDCl<sub>3</sub>, 75 MHz): 152.6 (C), 130.4 (CH), 127.8 (CH), 122.0 (CH), 121.4 (C), 115.7 (CH), 114.5 (C), 94.0 (C), 75.5 (CH<sub>2</sub>). IR (CH<sub>2</sub>Cl<sub>2</sub>, cm<sup>-1</sup>) 3311, 1620, 1485, 1435, 1255, 1127, 865, 751. EM (IE, m/z): 337 (M+), 210 (M+-I), 130 (M+-I-Br), 115, 91. HRMS (IE) Calcd for C<sub>9</sub>H<sub>6</sub>OBrI (M+H) 335.8647, Found 335.8655.

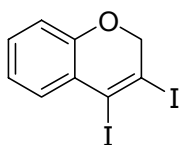

**3,4-Diiodo-2H-chromene. 2d** Yellow oil.  $R_f = 0.78$  (Hexane: EtOAc, 3:1). <sup>1</sup>H-NMR (CDCl<sub>3</sub>, 300 MHz): 7.40 (dd,  $J = 7.8, 1.6$  Hz, 1H), 7.16 (td,  $J = 7.9, 1.4$  Hz, 1H), 6.95 (td,  $J = 7.7, 1.4$  Hz, 1H), 6.75 (dd,  $J = 7.9, 1.1$  Hz, 1H), 4.92 (s, 2H).

<sup>13</sup>C-NMR (CDCl<sub>3</sub>, 75 MHz): 151.6 (C), 132.9 (CH), 130.3 (CH), 124.7 (C), 122.3 (CH), 115.7 (CH), 108.2 (C), 103.8 (C) 75.6 (CH<sub>2</sub>). IR (CH<sub>2</sub>Cl<sub>2</sub>, cm<sup>-1</sup>) 3060, 2922, 2847, 1650, 1609, 1477, 1229, 755. EM (IE, m/z): 384 (M+), 257 (M+-I), 130 (M+-2I),

115. HRMS (IE) Calcd for  $C_9H_6I_2O$  (M+H) 383.8508, Found 383.8509.

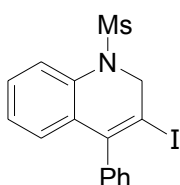

**3-Iodo-1-methanesulfonyl-4-phenyl-1,2-dihydro-**

**quinoline. 2e.** White solid mp = 112-114°C.  $R_f$  = 0.60 (Hexane: EtOAc, 2:1).  $^1H$ -NMR ( $CDCl_3$ , 300 MHz): 7.63 (d,  $J$  = 7.9 Hz, 1H), 7.49-7.48 (m, 3H), 7.34 (t,  $J$  = 7.4 Hz, 1H), 7.18-7.13 (m, 3H), 6.82 (d,  $J$  = 7.7 Hz, 1H), 4.84 (s, 2H), 2.91 (s, 3H).

$^{13}C$ -NMR ( $CDCl_3$ , 75 MHz): 144.3 (C), 140.6 (C), 134.9 (C), 131.1 (C), 129.6 (2xCH), 129.4 (CH), 129.2 (2xCH), 128.9 (CH), 127.6 (CH), 127.5 (CH), 127.3 (CH), 92.4 (C), 57.1 (CH<sub>2</sub>), 38.9 (CH<sub>3</sub>). IR ( $CH_2Cl_2$ ,  $cm^{-1}$ ) 3050, 1625, 1475, 1150, 490. HRMS (EI) Calcd for  $C_{16}H_{14}INO_2S$  (M+) 410.9790, Found. 410.9792.

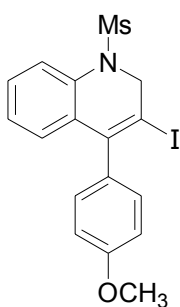

**3-Iodo-1-methanesulfonyl-4-(4-methoxyphenyl)-1,2-**

**dihydro-quinoline. 2f.** White solid mp = 114-116°C.  $R_f$  = 0.51 (Hexane: EtOAc, 3:1).  $^1H$ -NMR ( $CDCl_3$ , 300 MHz): 7.58 (d,  $J$  = 8.0 Hz, 1H), 7.30 (td,  $J$  = 7.7, 1.4 Hz, 1H), 7.14 (td,  $J$  = 7.7, 1.1 Hz, 1H), 7.08 (dd,  $J$  = 8.8, 1.1 Hz, 2H), 6.97 (dd,  $J$  = 8.8, 1.4 Hz, 2H), 6.83 (d,  $J$  = 8.0 Hz, 1H), 4.77 (s, 2H), 3.85 (s, 3H), 2.85 (s, 3H).

$^{13}\text{C}$ -NMR ( $\text{CDCl}_3$ , 75 MHz): 159.3 (C), 143.2 (C), 134.3 (C), 132.1 (C), 128.6 (2xCH), 134.2 (C), 129.8 (C), 128.5 (CH), 127.1 (CH), 130.7 (C), 130.3 (2xCH), 128.6 (CH), 127.0 (CH), 126.9 (CH), 126.5 (CH), 113.8 (2xCH), 91.7 (C), 56.5 ( $\text{CH}_2$ ), 55.1 ( $\text{CH}_3$ ), 38.3 ( $\text{CH}_3$ ). **IR** ( $\text{CH}_2\text{Cl}_2$ ,  $\text{cm}^{-1}$ ) 3080, 1625, 1475, 1100, 570. HRM

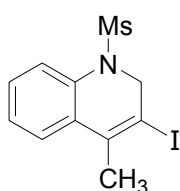

**3-Iodo-1-methanesulfonyl-4-methyl-1,2-dihydro-**

**quinoline. 2g.** White solid mp = 108-110°C.  $R_f$  = 0.55 (Hexane: EtOAc, 3:1).  $^1\text{H}$ -NMR ( $\text{CDCl}_3$ , 300 MHz): 7.54 (dd,  $J$  = 6.8, 1.5 Hz, 1H), 7.41-7.38 (m, 1H), 7.36-7.27 (m, 2H), 4.60 (s, 2H), 2.71 (s, 3H), 2.33 (s, 3H).

$^{13}\text{C}$ -NMR ( $\text{CDCl}_3$ , 75 MHz): 136.6 (C), 134.2 (C), 129.8 (C), 128.5 (CH), 127.1 (CH), 126.7 (CH), 124.1 (CH), 92.0 (C), 56.3 ( $\text{CH}_2$ ), 38.1 ( $\text{CH}_3$ ), 23.0 ( $\text{CH}_3$ ). **IR** ( $\text{CH}_2\text{Cl}_2$ ,  $\text{cm}^{-1}$ ) 3100, 1624, 1352, 1155, 465. HRMS (EI) Calcd for  $\text{C}_{11}\text{H}_{12}\text{NO}_2\text{Si}$  (M+1) 349.9667, Found. 349.9659.

S (EI)  $\text{C}_{17}\text{H}_{16}\text{NO}_3\text{Si}$  (M+) 440.9896, Found. 440.9894.

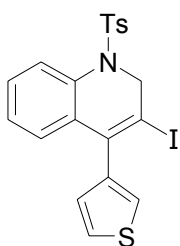

**3-Iodo-4-thiophen-3-yl-1-(toluene-4-sulfonyl)-1,2-**

**dihydroquinoline. 2h.** White solid (mp = 120-122°C).  $R_f$  = 0.62 (Hexane: EtOAc, 3:1).  $^1\text{H}$ -NMR ( $\text{CDCl}_3$ , 300 MHz): 7.75 (d,  $J$  = 8.0 Hz, 1H), 7.37-7.32 (m, 3H), 7.17-7.08 (m, 4H), 6.65-6.61 (m, 2H), 6.23 (dd,  $J$  = 5.1, 1.4 Hz, 1H), 4.83 (s, 2H), 2.38 (s, 3H).

$^{13}\text{C}$ -NMR ( $\text{CDCl}_3$ , 75 MHz): 143.7 (C), 141.3 (C), 139.5 (C), 138.5 (C), 135.4 (C), 134.0 (C), 130.7 (C), 129.2 (2xCH), 128.5 (CH), 128.0 (CH), 127.4 (2xCH), 127.3 (CH), 127.0 (CH), 126.2 (CH), 125.1 (CH), 124.8 (CH), 93.3 (C), 56.8 ( $\text{CH}_2$ ), 21.4 ( $\text{CH}_3$ ). **IR** ( $\text{CH}_2\text{Cl}_2$ ,  $\text{cm}^{-1}$ ) 3150, 1620, 1470, 750. HRMS (EI)  $\text{C}_{20}\text{H}_{16}\text{INO}_2\text{S}_2$  (M+) 493.9712, Found. 493.9722.

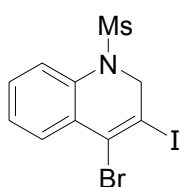

**4-Bromo-3-iodo-1-methanesulfonyl-1,2-dihydro-**

**quinoline. 2i.** White solid (mp = 110-112°C).  $R_f$  =

0.47 (Hexane: EtOAc, 3:1).  $^1\text{H}$ -NMR ( $\text{CDCl}_3$ , 300 MHz):

7.73 (dd,  $J$  = 7.7, 1.8 Hz, 1H), 7.58 (dd,  $J$  = 7.8, 1.4

Hz, 1H), 7.40 (td,  $J$  = 7.6, 1.7 Hz, 1H), 7.35 (td,  $J$  =

7.6, 1.4 Hz, 1H), 4.69 (s, 2H), 2.77 (s, 3H).

$^{13}\text{C}$ -NMR ( $\text{CDCl}_3$ , 75 MHz): 134.1 (C), 129.9 (CH), 128.7 (C), 128.5 (CH), 127.9 (C), 127.6 (CH), 126.6 (CH), 95.7 (C), 57.4 ( $\text{CH}_2$ ), 38.4 ( $\text{CH}_3$ ). **IR** ( $\text{CH}_2\text{Cl}_2$ ,  $\text{cm}^{-1}$ ) 3120, 1625, 1470, 420. HRMS (EI)  $\text{C}_{10}\text{H}_9\text{BrINO}_2\text{S}$  (M+) 412.8582, Found. 412.8589.

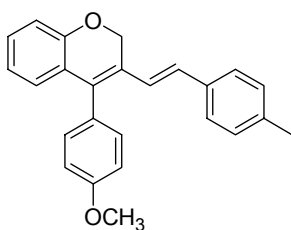

**4-(4-Methoxy-phenyl)-3-(2-p-tolyl-vinyl)-2H-**

**chromene. 4a.** Yellow solid. mp = 97-99 °C.  $R_f$  =

0.59 (Hexane: EtOAc, 20:1).  $^1\text{H}$ -NMR ( $\text{CDCl}_3$ , 200

MHz): 7.4-6.84 (m, 13H), 6.52 (d,  $J$  = 16.7 Hz,

1H), 5.22 (s, 2H), 3.95 (s, 3H), 2.38 (s, 3H).

$^{13}\text{C}$ -NMR ( $\text{CDCl}_3$ , 75 MHz): 158.7 (C), 153.9 (C), 138.4 (C), 134.1 (C), 133.7 (CH), 132.0 (C), 131.0 (2xCH), 129.8 (C), 129.8 (C), 129.4 (2xCH), 128.6 (CH), 127.4 (CH), 127.1 (C),



126.6 (2xCH), 125.3 (C), 124.2 (CH), 121.8 (CH), 115.4 (CH), 113.8 (2xCH), 66.7 (CH<sub>2</sub>), 57.4 (CH<sub>3</sub>), 21.1 (CH<sub>3</sub>). IR (CH<sub>2</sub>Cl<sub>2</sub>, cm<sup>-1</sup>) 3056, 2947, 1727, 1083. HRMS (IE) Calcd for C<sub>25</sub>H<sub>22</sub>O<sub>2</sub> 354.1620, Found 354.1616.

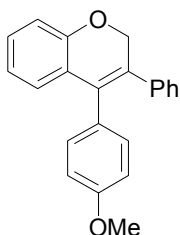

**4-(4-Methoxyphenyl)-3-phenyl-2H-chromene. 4b.**

Orange solid. mp = 100-102 °C. *R<sub>f</sub>* = 0.64 (Hexane: EtOAc, 10:1). <sup>1</sup>H-NMR (CDCl<sub>3</sub>, 300 MHz): 7.30 (dd, *J* = 8.8, 1.1 Hz, 1H), 7.19-7.15 (m, 7H), 7.07-7.01 (m, 3H), 6.88 (t, *J* = 6.5 Hz, 1H), 6.86 (d, *J* = 8.0 Hz, 1H), 5.12 (s, 2H), 3.82 (s, 3H).

<sup>13</sup>C-NMR (CD<sub>2</sub>Cl<sub>2</sub>, 75 MHz): 161.2 (C), 156.3 (C), 140.9 (C), 138.8 (C), 132.1 (2xCH), 131.3 (CH), 130.7 (2xCH), 130.5 (2xCH), 129.5 (C), 128.8 (CH), 127.4 (C), 126.3 (C), 123.6 (CH), 121.8 (CH), 118.0 (CH), 116.0 (2xCH), 72.0 (CH<sub>2</sub>), 57.5 (CH<sub>3</sub>). IR (CH<sub>2</sub>Cl<sub>2</sub>, cm<sup>-1</sup>) 2960, 1728, 1032. HRMS (IE) Calcd for C<sub>25</sub>H<sub>18</sub>O<sub>2</sub> 314.1301, Found 314.1307.

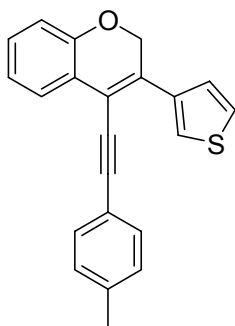

**4-(2-(4-Methoxyphenyl)ethynyl)-3-(3-thiophenyl)-2H-chromene. 4c.** Pale Yellow solid. mp= 115-117°C (dec). *R<sub>f</sub>* = 0.8 (Hexane: EtOAc, 3:1). <sup>1</sup>H-NMR (CDCl<sub>3</sub>, 300 MHz): 7.83 (dd, *J* = 7.1, 1.7 Hz, 1H), 7.53-7.51 (m, 3H), 7.48-7.44 (m, 3H), 7.32 (t, *J* = 7.7 Hz, 1H), 7.23 (d, *J* = 7.7 Hz, 2H), 7.17 (t, *J* = 1H), 5.21 (s, 2H), 2.45 (s, 3H).

$^{13}\text{C}$ -NMR ( $\text{CDCl}_3$ , 75 MHz): 160.8 (C), 153.0 (C), 138.5 (C), 137.0 (C), 131.3 (2xCH), 130.0 (CH), 129.4 (CH), 129.4 (CH), 129.0 (CH), 128.6 (C), 128.3 (2xCH), 126.2 (CH), 122.6 (C), 121.7 (CH), 119.9 (C), 115.6 (CH), 95.3 (C), 84.4 (C), 68.6 ( $\text{CH}_2$ ), 21.4 ( $\text{CH}_3$ ). HRMS (EI) Calcd for  $\text{C}_{22}\text{H}_{16}\text{OS}$  328.0922, Found. 328.0925.

**Synthesis of (R)-(1,3-diphenylprop-2-ynyloxy)benzene (1j)**

(R)-(+)-1-phenyl-2-propyn-1-ol (5.0 mmol) was treated with phenol (5.3 mmol) in 25 mL of THF, then triphenylphosphine (5.0 mmol) was added. The solution was cooled to  $0^\circ\text{C}$  and diisopropyl azodicarboxylate (6.0 mmol) was added dropwise via syringe. The ice bath was removed and the mixture was stirred under nitrogen atmosphere, for 18 h. Removal of solvent and purification by column chromatography (hexanes:EtOAc = 20:1) yields (S)-(1-Phenylprop-2-ynyloxy)benzene as a colorless oil in 35%. This product was then subjected to conventional Sonogashira cross-coupling reaction with iodobenzene using  $\text{PdCl}_2(\text{PPh}_3)_2$  (5 mol%) as catalyst in presence of CuI (10 mol%), in triethylamine as solvent, at room temperature for 2 hours, resulting in (R)-(1,3-diphenylprop-2-ynyloxy)benzene in 66 % yield and 88% ee, as determined by HPLC analysis (Chiracel OJ, 5% *i*PrOH in Hexanes, 225nm)  $t_r = 34.89$  min. (minor),  $t_r = 28.45$  min. (major).

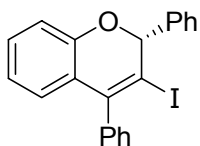

**(R)-3-Iodo-2,4-diphenyl-2H-chromene 2j.** Pale oil. 85% ee as determined by HPLC analysis (Chiracel OJ, 5% *i*PrOH in Hexanes, 225nm)  $t_r = 25,91$  min. (minor),  $t_r = 20.23$  min. (major).  $R_f = 0.50$  (Hexane: EtOAc, 20:1).  $^1\text{H-NMR}$  ( $\text{CDCl}_3$ , 300 MHz): 7.59-7.49 (m, 5H), 7.44-7.40 (m, 4H), 7.27 (m, 1H), 7.16 (td,  $J = 8.4, 1.14$  Hz, 1H), 6.82-6.76 (m, 2H), 6.69 (dd,  $J = 7.6, 1.7$  Hz, 1H), 6.19 (s, 1H).

$^{13}\text{C-NMR}$  ( $\text{CDCl}_3$ , 75 MHz): 151.5 (C), 142.3 (C), 140.3 (C), 137.6 (C), 129.9 (CH), 128.9 (CH), 128.6 (2xCH), 128.5 (2xCH), 128.1 (CH), 128.0 (2xCH), 127.9 (2xCH), 126.3 (CH), 123.4 (C), 121.2 (CH), 116.5 (CH), 94.8 (C), 84.8 (CH). 76.4 (C). IR ( $\text{CH}_2\text{Cl}_2$ ,  $\text{cm}^{-1}$ ) 3057, 2927, 2835, 1950, 1498, 1224, 753, 690. HRMS (70 eV, EI) Calcd for  $\text{C}_{21}\text{H}_{15}\text{IO}$  (M+H) 410.0168, Found 410.0167.

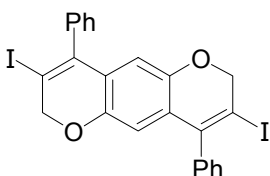

**3,8-Diiodo-4,9-diphenyl-2,7-dihydro-pyran[2,3-g]chromene. 6.** White solid mp = dec. at  $210^\circ\text{C}$ .  $R_f = 0.80$  (Hexane: EtOAc, 10:1).  $^1\text{H-NMR}$  ( $\text{CDCl}_3$ , 300 MHz): 7.47-7.41 (m, 6H), 7.20-7.17 (m, 4H), 6.18 (s, 2H), 4.92 (s, 4H).  $^{13}\text{C-NMR}$  ( $\text{CDCl}_3$ , 75 MHz): 147.4 (C), 141.5 (C), 139.4 (C), 129.1 (2xCH), 128.6 (2xCH), 128.2 (CH), 124.7 (C), 113.4 (CH), 92.4 (C), 74.9 ( $\text{CH}_2$ ).

**IR** (CH<sub>2</sub>Cl<sub>2</sub>, cm<sup>-1</sup>) 3056, 2925, 1652, 1594, 1480. HRMS (EI)

Calcd for C<sub>24</sub>H<sub>16</sub>I<sub>2</sub>O<sub>2</sub> 590.9318, Found. 590.9309.

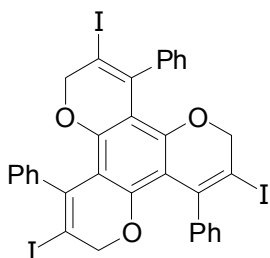

**3,7,11-Triiodo-4,8,12-triphenyl-2H,6H,10H-**

**dipyran[2,3-f;2',3'-h]chromene. 8.** Pale solid. mp

= dec. at 250 °C. *R<sub>f</sub>* = 0.70 (Hexane: EtOAc, 3:1).

<sup>1</sup>H-NMR (CDCl<sub>3</sub>, 300 MHz): 7.41-7.33 (m, 9H), 7.16-7.13 (m, 6H), 4.28 (s, 6H).

<sup>13</sup>C-NMR (CDCl<sub>3</sub>, 75 MHz): 151.6 (C), 142.7 (C), 139.0 (C), 128.2 (2xCH), 127.6 (2xCH), 127.1 (CH), 109.2 (C), 87.9 (C), 74.5 (CH<sub>2</sub>). IR (CH<sub>2</sub>Cl<sub>2</sub>, cm<sup>-1</sup>) 3050, 2920, HRMS (EI) Calcd for C<sub>33</sub>H<sub>21</sub>I<sub>3</sub>O<sub>3</sub> 845.8625, Found. 845.8629.

#### **General Procedure for Cyclizations using NaI/H<sub>2</sub>O/H<sup>+</sup>.**

The 1-aryl- $\omega$ -alkyne (1 mmol, 1 equiv) was added to a solution of NaI (1 mmol, 1. equiv, 0.15 g) in water (15 mL). The flask was cooled down in an ice-water-bath and H<sub>2</sub>SO<sub>4</sub> (4 mmol, 8 equiv, 0.22 mL) and H<sub>2</sub>O<sub>2</sub> 33 % solution (6 mmol, 6 equiv, 0.3 mL) were sequentially added. The resulting mixture was heated in an oil bath (40°C) (5 h for **1a** and 20 h for **1k**). The reaction mixture was then allowed to cool, transferred to a separation funnel and extracted with ethyl acetate (3x25 mL). The combined organic layers were washed with H<sub>2</sub>O (2x50 mL) and Na<sub>2</sub>S<sub>2</sub>O<sub>3</sub> 5 % solution in water (2x50 mL)

and dried over anhydrous sodium sulfate. Concentration of solvents and further purification gave **2a** (50%) and **2k** (52%).

#### General Procedure for Cyclization using I<sub>2</sub>.

The 1-aryl-w-alkyne (1 mmol, 1 equiv) was added to a heterogeneous solution of I<sub>2</sub> (3 mmol, 3 equiv, 0.76 g for **1a** and 2 mmol, 2 equiv, 0.51g for **1k**, **1l**, **1m** and **1n**) in 15 mL of water. For **1n** H<sub>2</sub>SO<sub>4</sub> (5 mmol, 10 equiv, 0.27 mL) or 1 g of Amberlyst® -15-wet The reaction mixture was stirred for 2 h at room temperature and then transferred to a separation funnel and extracted with ethyl acetate (3x25 mL). The combined organic layers were washed with H<sub>2</sub>O (2x50 mL) and Na<sub>2</sub>S<sub>2</sub>O<sub>3</sub> 5 % solution in water (2x50 mL) and dried over anhydrous sodium sulfate. Concentration of solvents and further purification gave **2a** (75%), **2k** (90%), **9** (95%), **2m** (35%) and **2n** (90%)

#### Spectroscopic data of compounds **2k**, **9**, **2m**, **10** and **2n**:

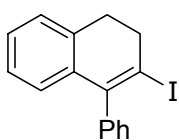

**1,2-dihydro-3-iodo-4-phenylnaphthalene. 2k.** Yellow oil.  $R_f = 0.61$  (Hexane). <sup>1</sup>H-NMR (CDCl<sub>3</sub>, 400 MHz): 7.5 (m, 3H), 7.2-7.1 (m, 5H), 6.7 (d,  $J = 7.4$  Hz, 1H), 3.25 (m, 2H), 3.1 (m, 2H).

<sup>13</sup>C-NMR (CDCl<sub>3</sub>, 100 MHz): 144.4 (C), 143.1 (C), 135.1 (C), 134.5 (C), 129.5 (CH x 2), 128.3 (CH x 2), 127.4 (CH), 127.3 (CH), 127.2 (CH), 126.4 (CH), 126.2 (CH), 100.9 (C), 39.6

(CH<sub>2</sub>), 29.9 (CH<sub>2</sub>) HRMS (IE) Calcd for C<sub>16</sub>H<sub>13</sub>I (M+H) 332.0062, Found 332.0017. Anal. Calcd for C<sub>16</sub>H<sub>13</sub>I: C, 57.85%; H, 3.94%, Found: C, 57.98%; H, 3.81%.

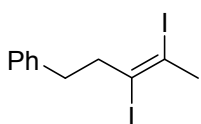

**1-((E)-3,4-diiodopent-3-enyl)benzene. 9** Yellow oil.

$R_f = 0.8$  (Hexane). <sup>1</sup>H-NMR (CDCl<sub>3</sub>, 300 MHz): 7.4-7.2 (m, 5H), 3.1-2.9 (m, 4H), 2.65 (s, 3H).

<sup>13</sup>C-NMR (CDCl<sub>3</sub>, 75 MHz): 139.2 (C), 128.6 (CH x 2), 128.3 (CH x 2), 126.2 (CH), 101.0 (C), 94.2 (C), 53.1 (CH<sub>2</sub>), 40.2 (CH<sub>2</sub>), 34.1 (CH<sub>3</sub>) HRMS (IE) Calcd for C<sub>11</sub>H<sub>12</sub>I<sub>2</sub> (M+H) 397.9028, Found 397.9032.

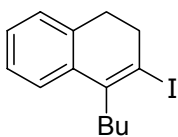

**1-butyl-3,4-dihydro-2-iodonaphthalene. 2m** Yellow

oil.  $R_f = 0.8$  (Hexane). <sup>1</sup>H-NMR (CDCl<sub>3</sub>, 300 MHz): 7.4-7.1 (m, 4H), 3.1-2.4 (m, 6H), 1.7-1.3 (m, 4H), 1 (t,  $J = 7.1$  Hz, 3H).

<sup>13</sup>C-NMR (CDCl<sub>3</sub>, 75 MHz): 140.0 (C), 135.6 (C), 133.4 (C), 127.4 (CH), 126.9 (CH), 126.5 (CH), 123.3 (CH), 100.9 (C), 40.1 (CH<sub>2</sub>), 37.4 (CH<sub>2</sub>), 30.4 (CH<sub>2</sub>), 30.3 (CH<sub>2</sub>), 22.7 (CH<sub>2</sub>), 14.1 (CH<sub>3</sub>) HRMS (IE) Calcd for C<sub>14</sub>H<sub>17</sub>I (M+H) 312.0375, Found 312.0370.

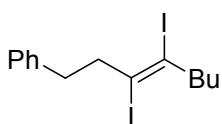

**1-((E)-3,4-diiodooct-3-enyl)benzene. 10** Yellow

oil.  $R_f = 0.75$  (Hexane). <sup>1</sup>H-NMR (CDCl<sub>3</sub>, 300 MHz): 7.4-7.1 (m, 5H), 3.1-2.4 (m, 6H), 1.7-1.3 (m, 4H), 1

(t,  $J = 7.1$  Hz, 3H).

$^{13}\text{C}$ -NMR ( $\text{CDCl}_3$ , 75 MHz): 139.8 (C), 128.7 (CH  $\times$  2), 128.1 (CH  $\times$  2), 126.1 (CH), 103.1 (C), 99.9 (C), 53.0 ( $\text{CH}_2$ ), 50.5 ( $\text{CH}_2$ ), 34.5 ( $\text{CH}_2$ ), 30.2 ( $\text{CH}_2$ ), 21.4 ( $\text{CH}_2$ ), 14.0 ( $\text{CH}_3$ ) HRMS (IE) Calcd for  $\text{C}_{14}\text{H}_{18}\text{I}_2$  (M+H) 439.9488, Found 439.9481.

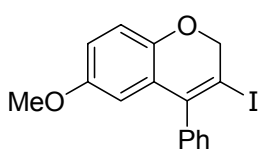

**3-iodo-6-methoxy-4-phenyl-2H-chromene. 2n** Yellow oil.  $R_f = 0.37$  (Hexane: dichloromethane, 3:1).  $^1\text{H}$ -NMR ( $\text{CDCl}_3$ , 300 MHz): 7.5 (m, 3H), 7.2 (m, 2H), 6.85 (d,  $J = 8.8$  Hz, 1H), 6.75 (dd,  $J = 8.8, 2.9$  Hz, 1H), 6.2 (d,  $J = 2.9$  Hz, 1H), 5.1 (s, 2H), 3.6 (s, 3H).

$^{13}\text{C}$ -NMR ( $\text{CDCl}_3$ , 75 MHz): 154.0 (C), 147.1 (C), 141.8 (C), 139.7 (C), 129.2 (CH  $\times$  2), 128.5 (CH  $\times$  2), 128.1 (CH), 124.9 (C), 116.3 (CH), 114.1 (CH), 112.3 (CH), 92.1 (C), 75.0 ( $\text{CH}_2$ ), 55.5 ( $\text{CH}_3$ ) HRMS (IE) Calcd for  $\text{C}_{16}\text{H}_{13}\text{IO}_2$  (M+H) 363.9960, Found 363.9956. Anal. Calcd for  $\text{C}_{16}\text{H}_{13}\text{IO}_2$ : C, 52.77%; H, 3.60%, Found: C, 52.52%; H, 3.68%.

2a

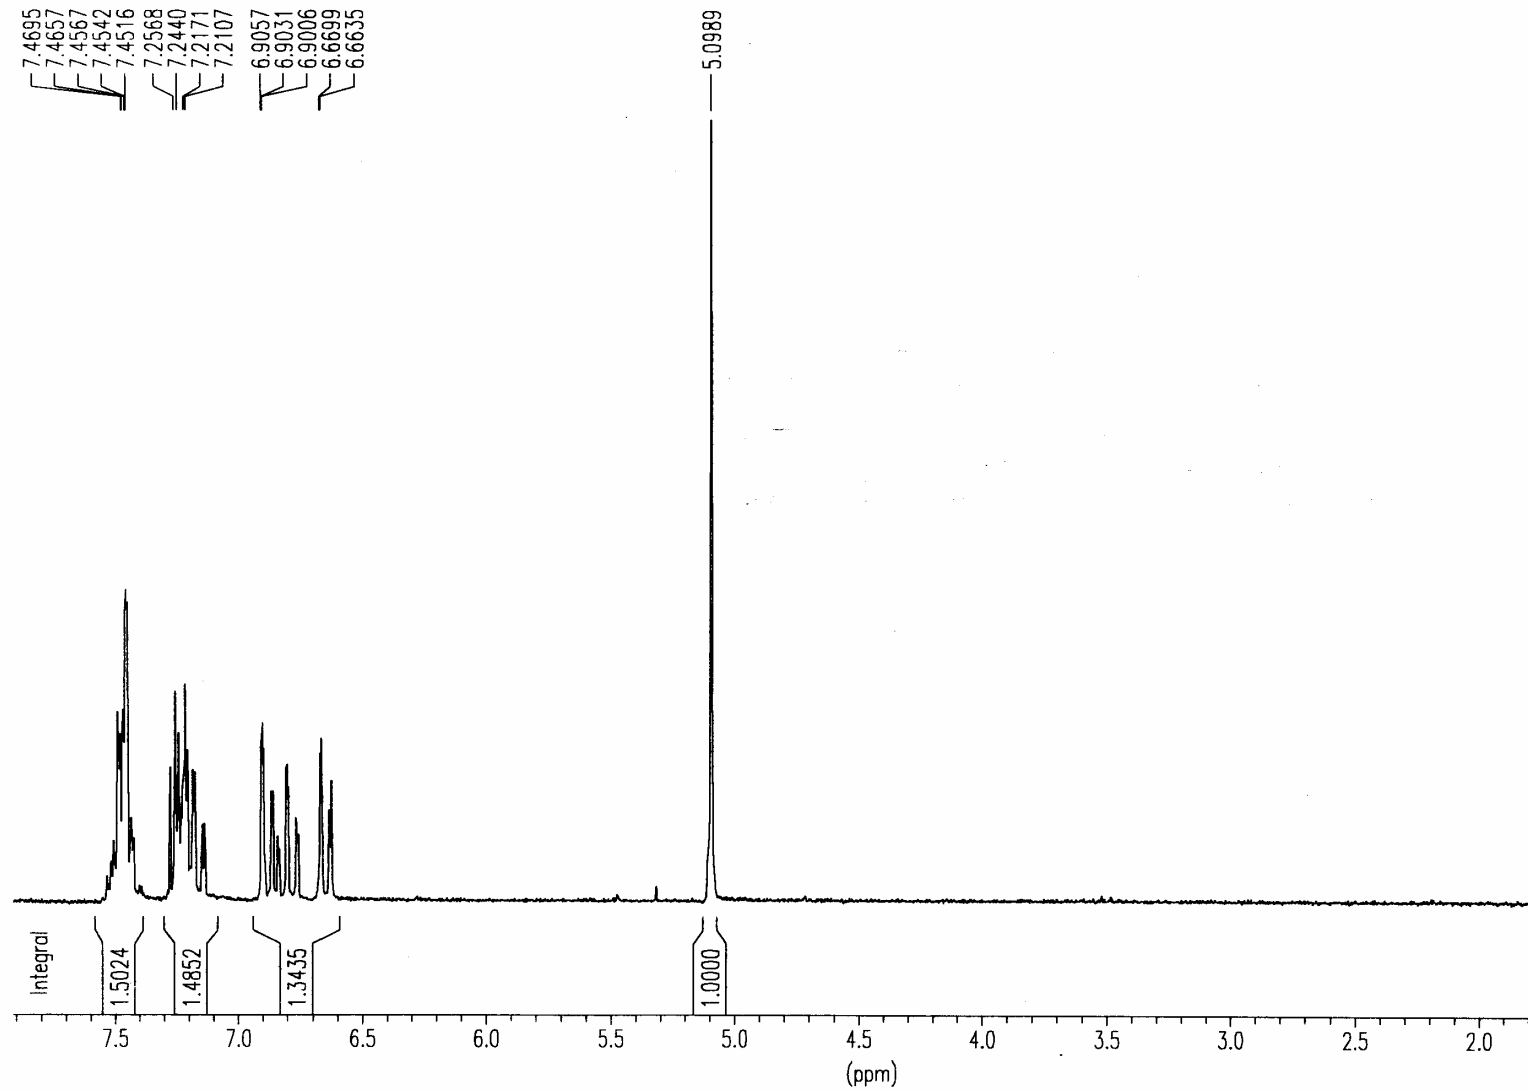



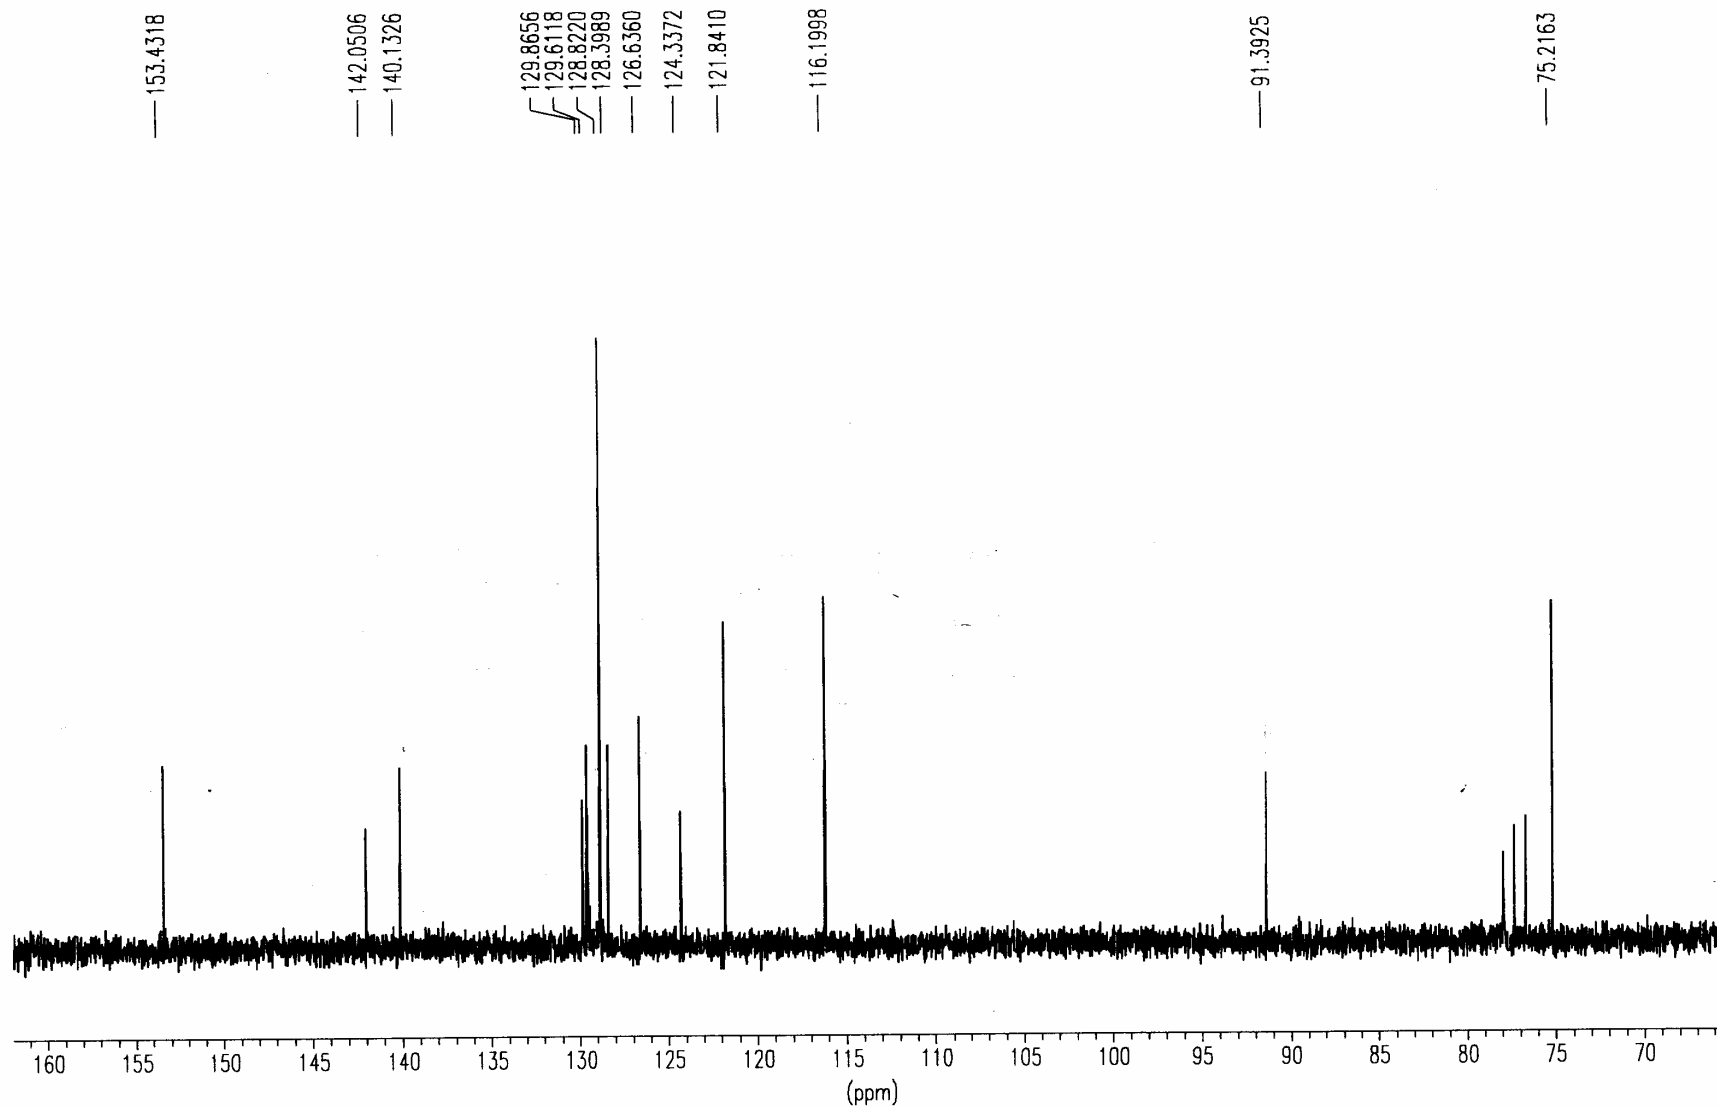

2b

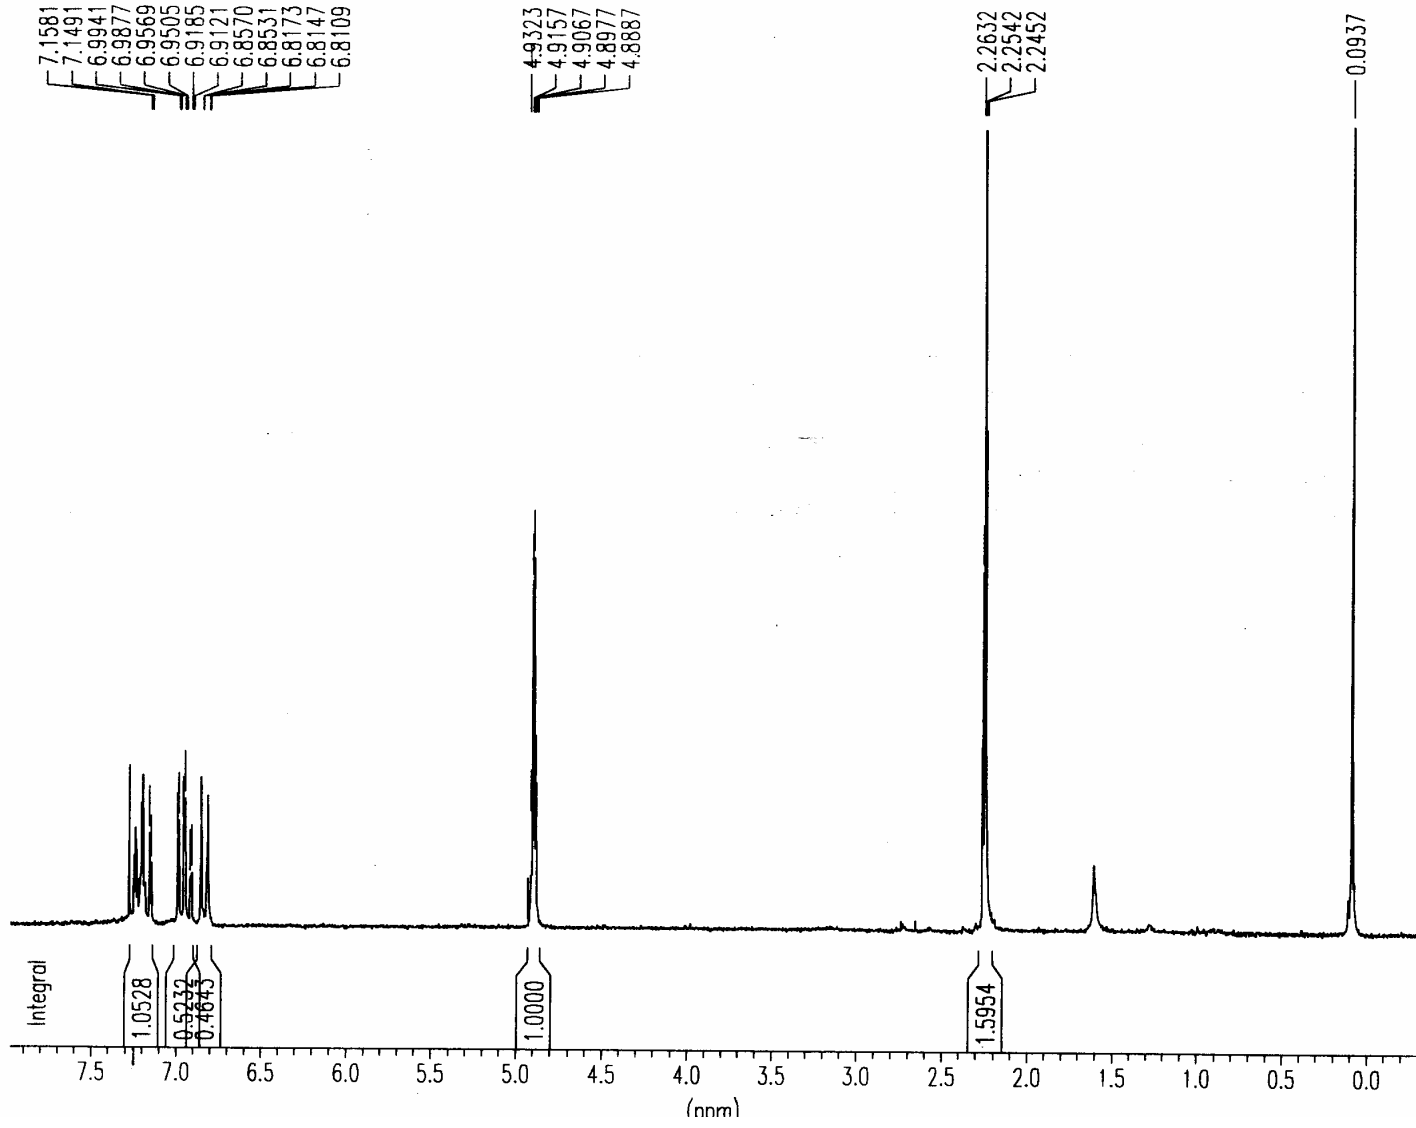

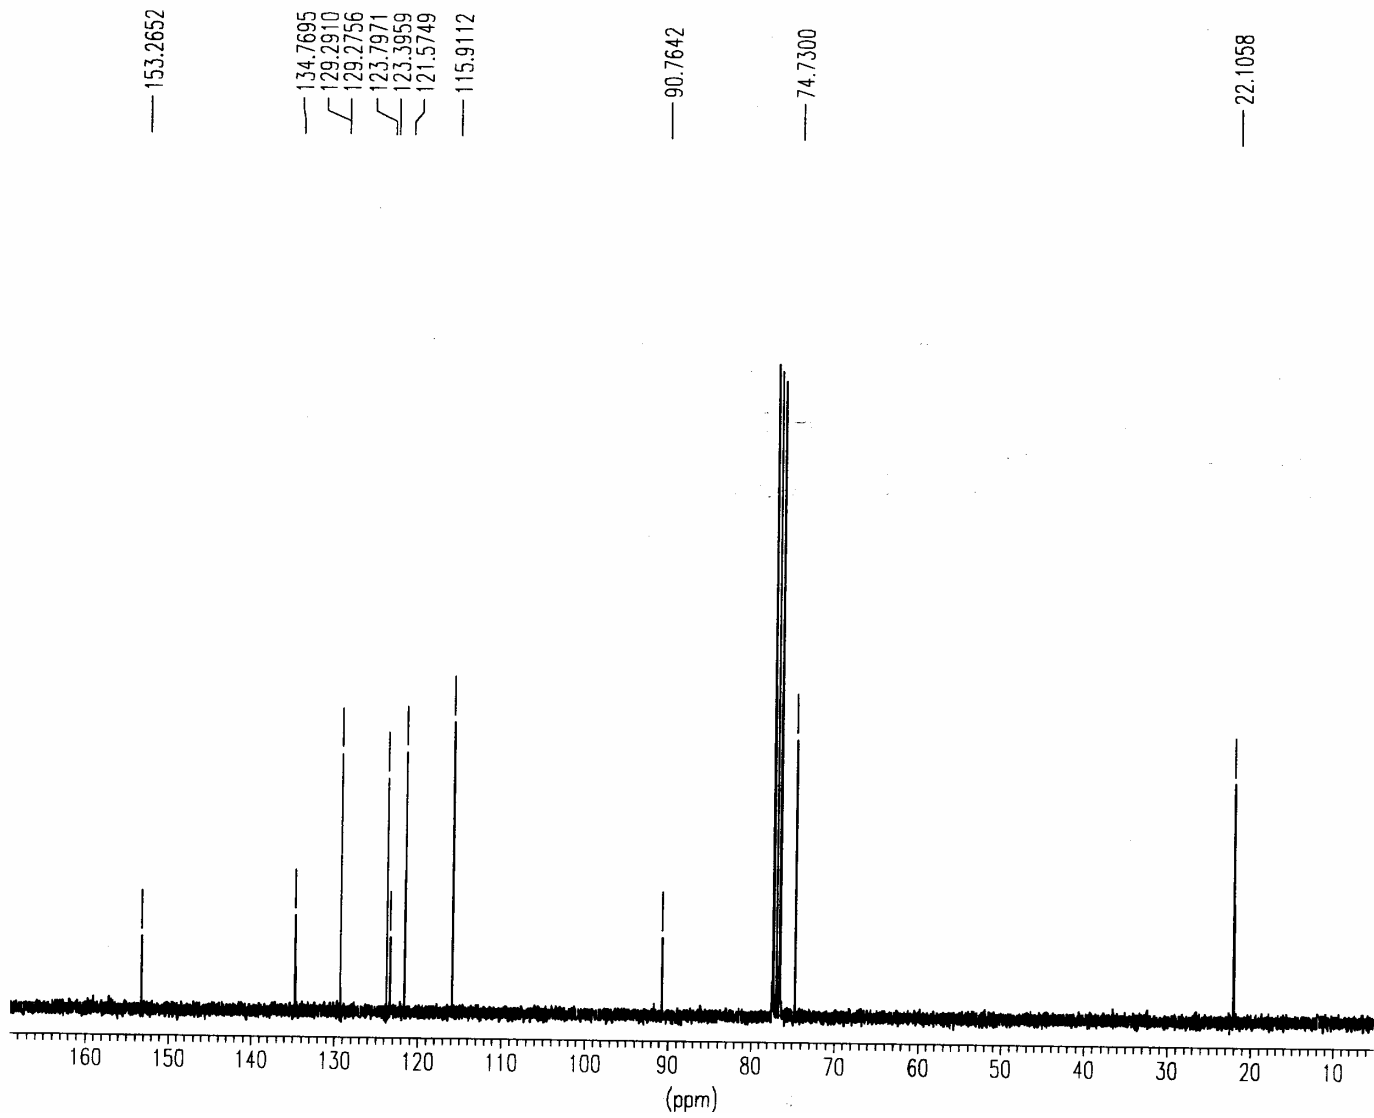

2c

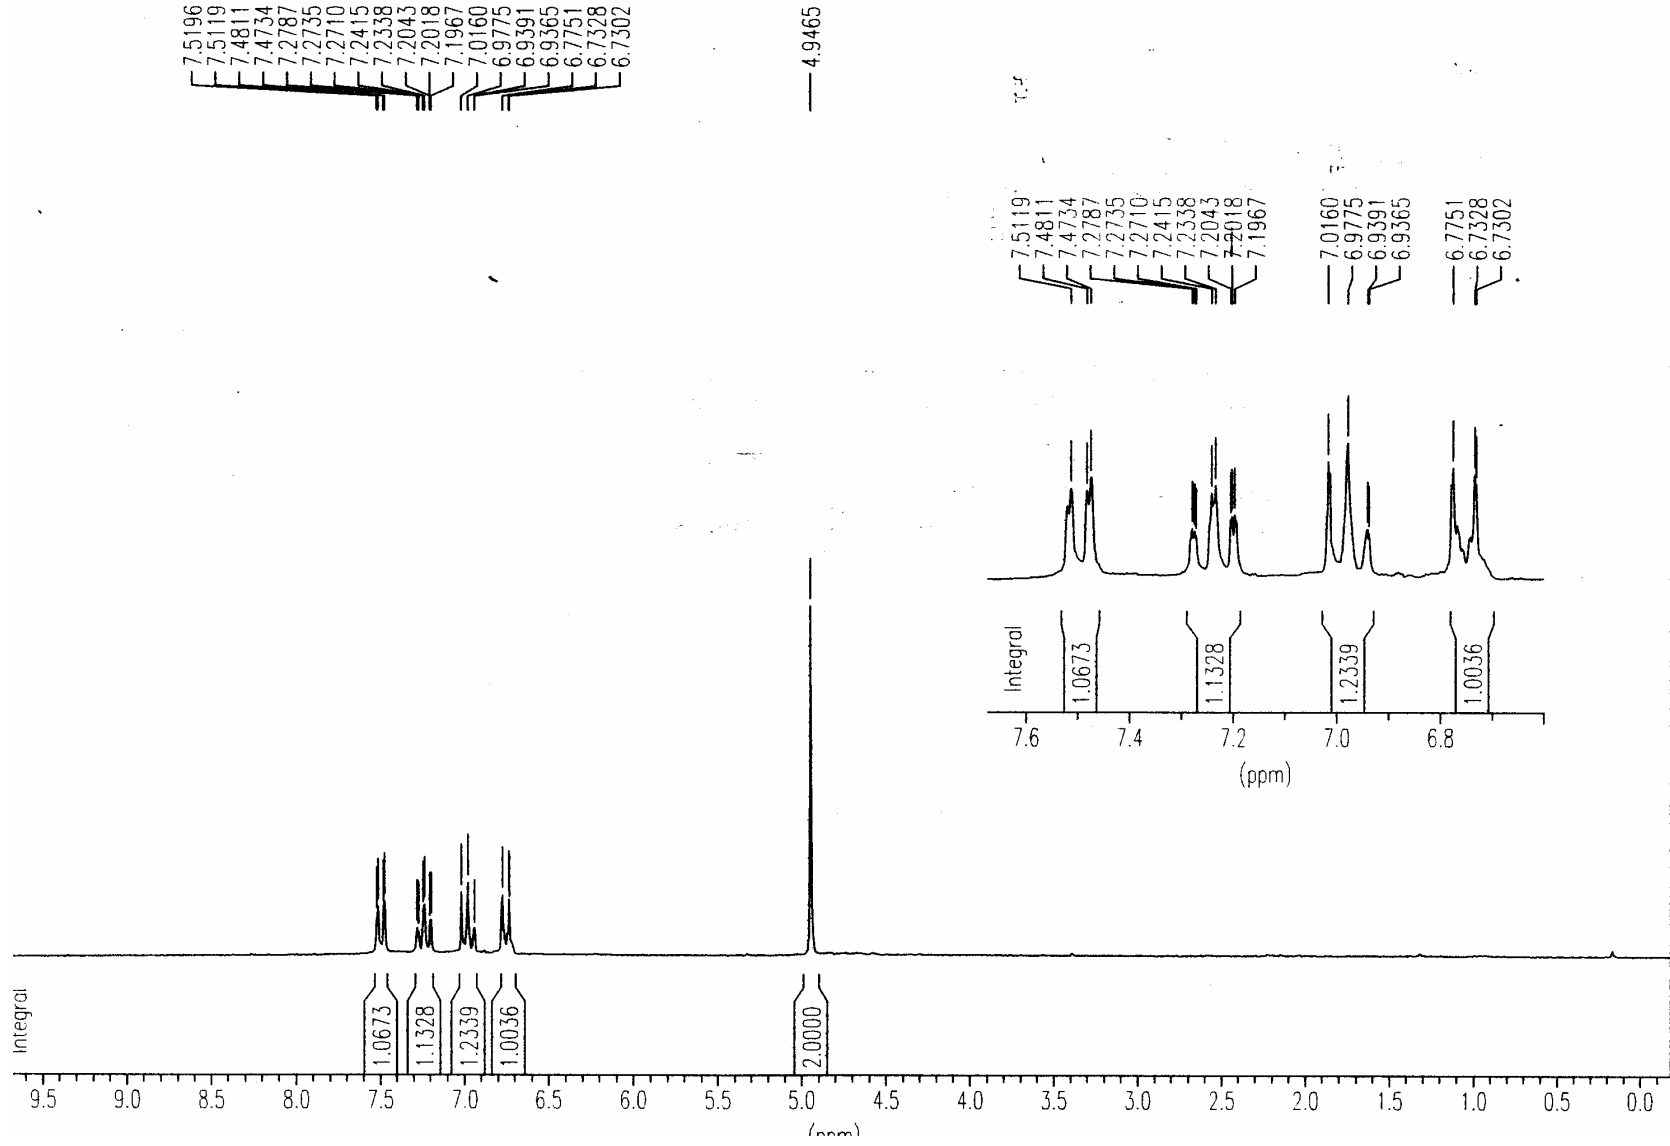

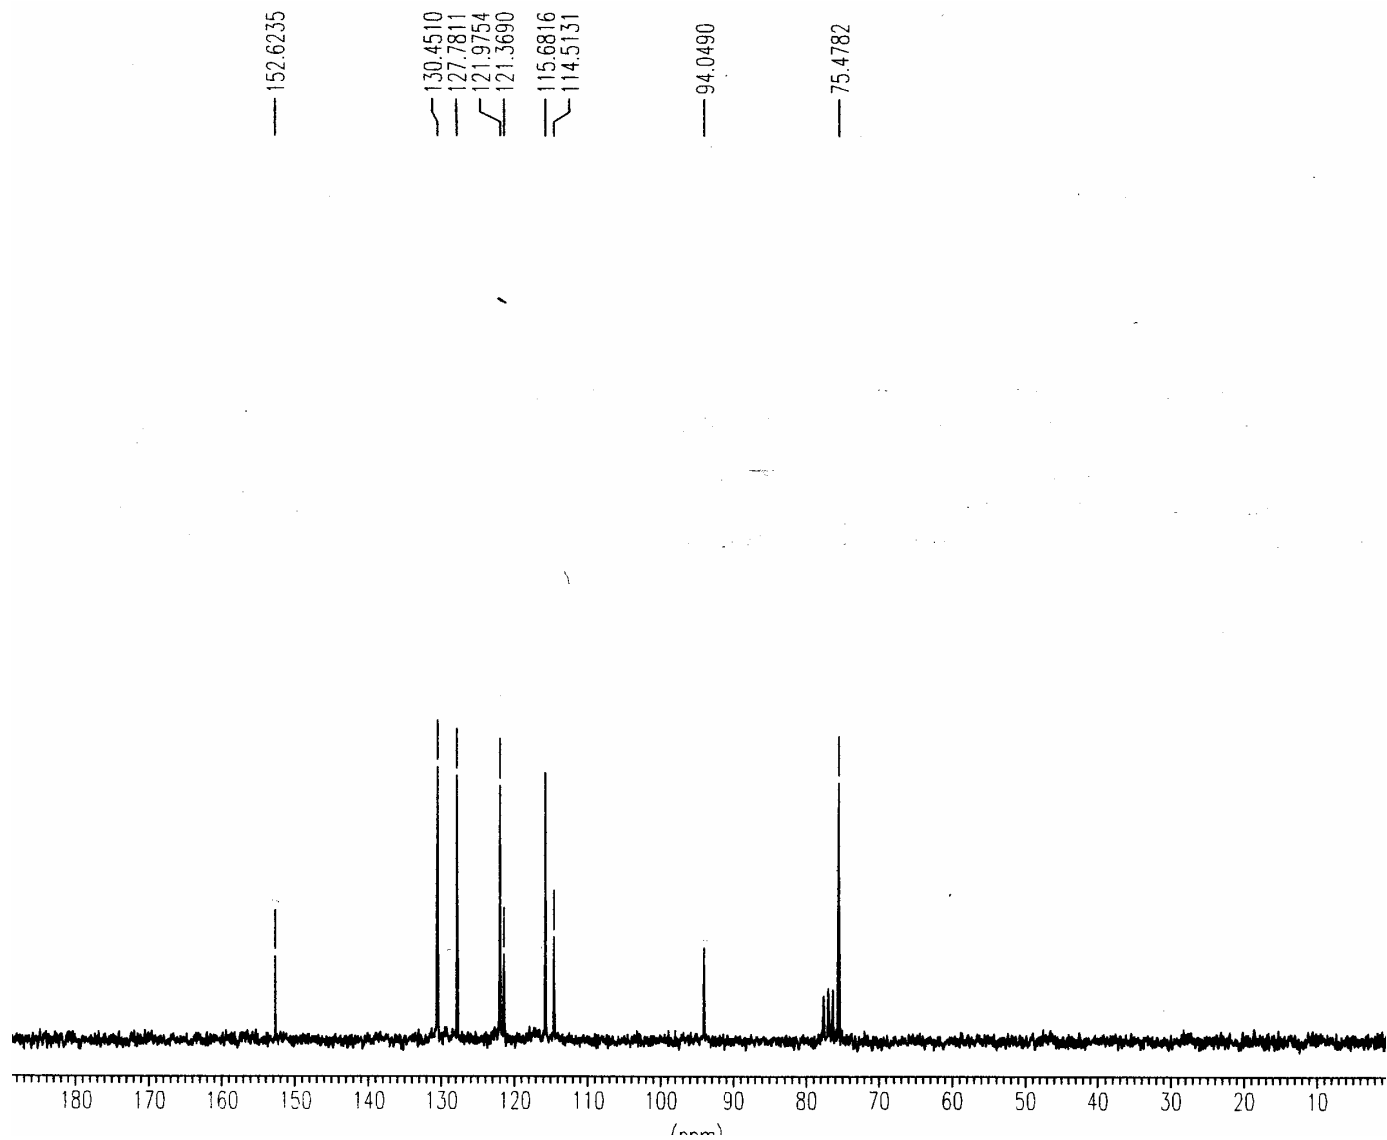

2d

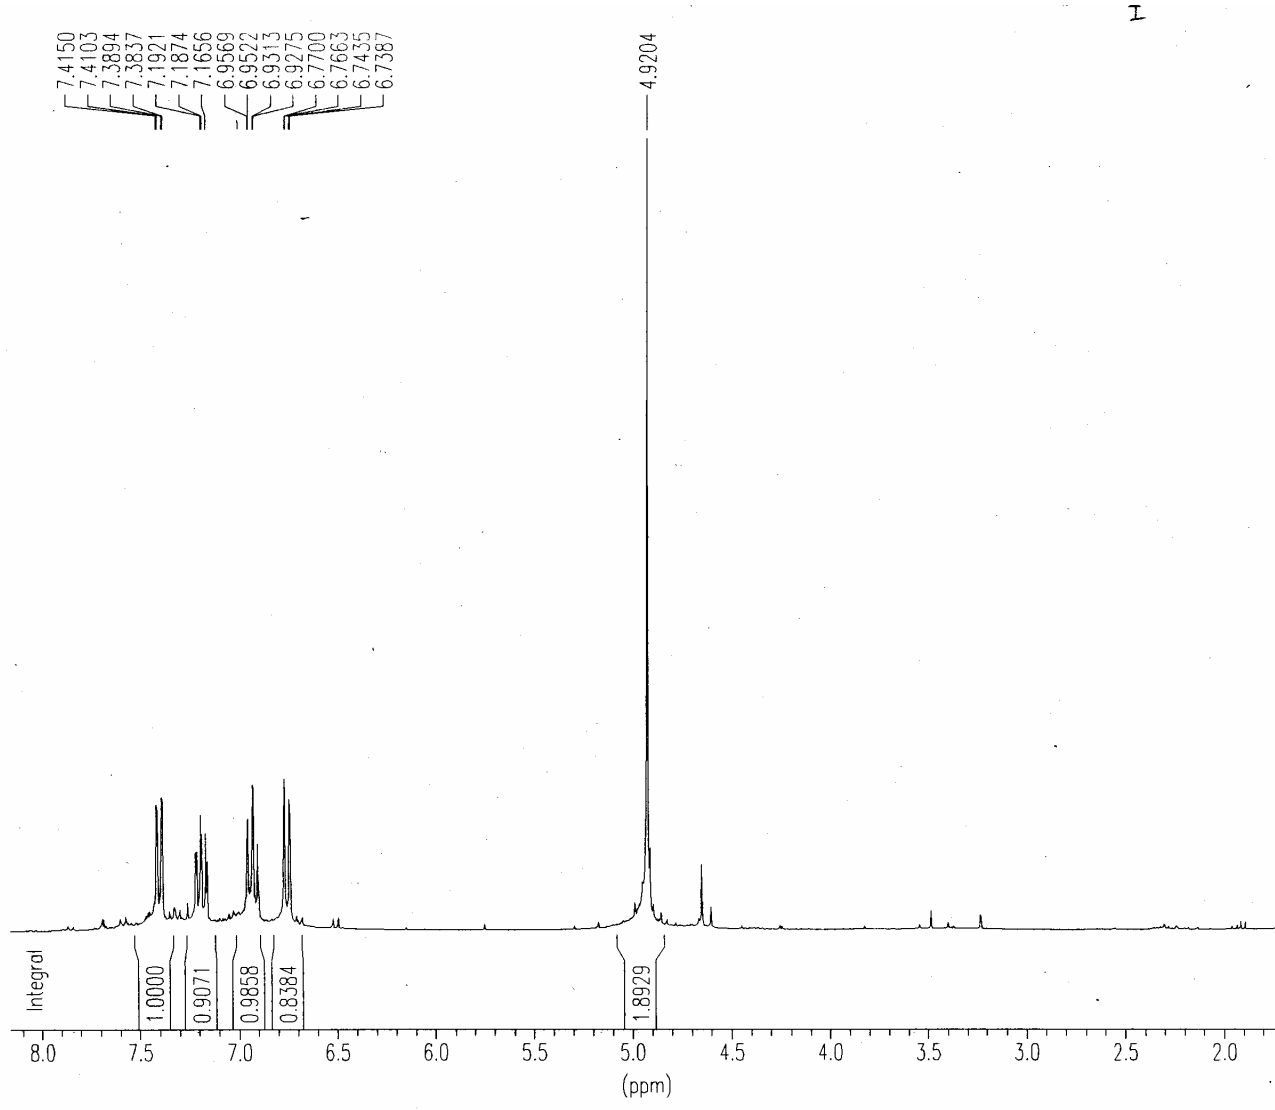

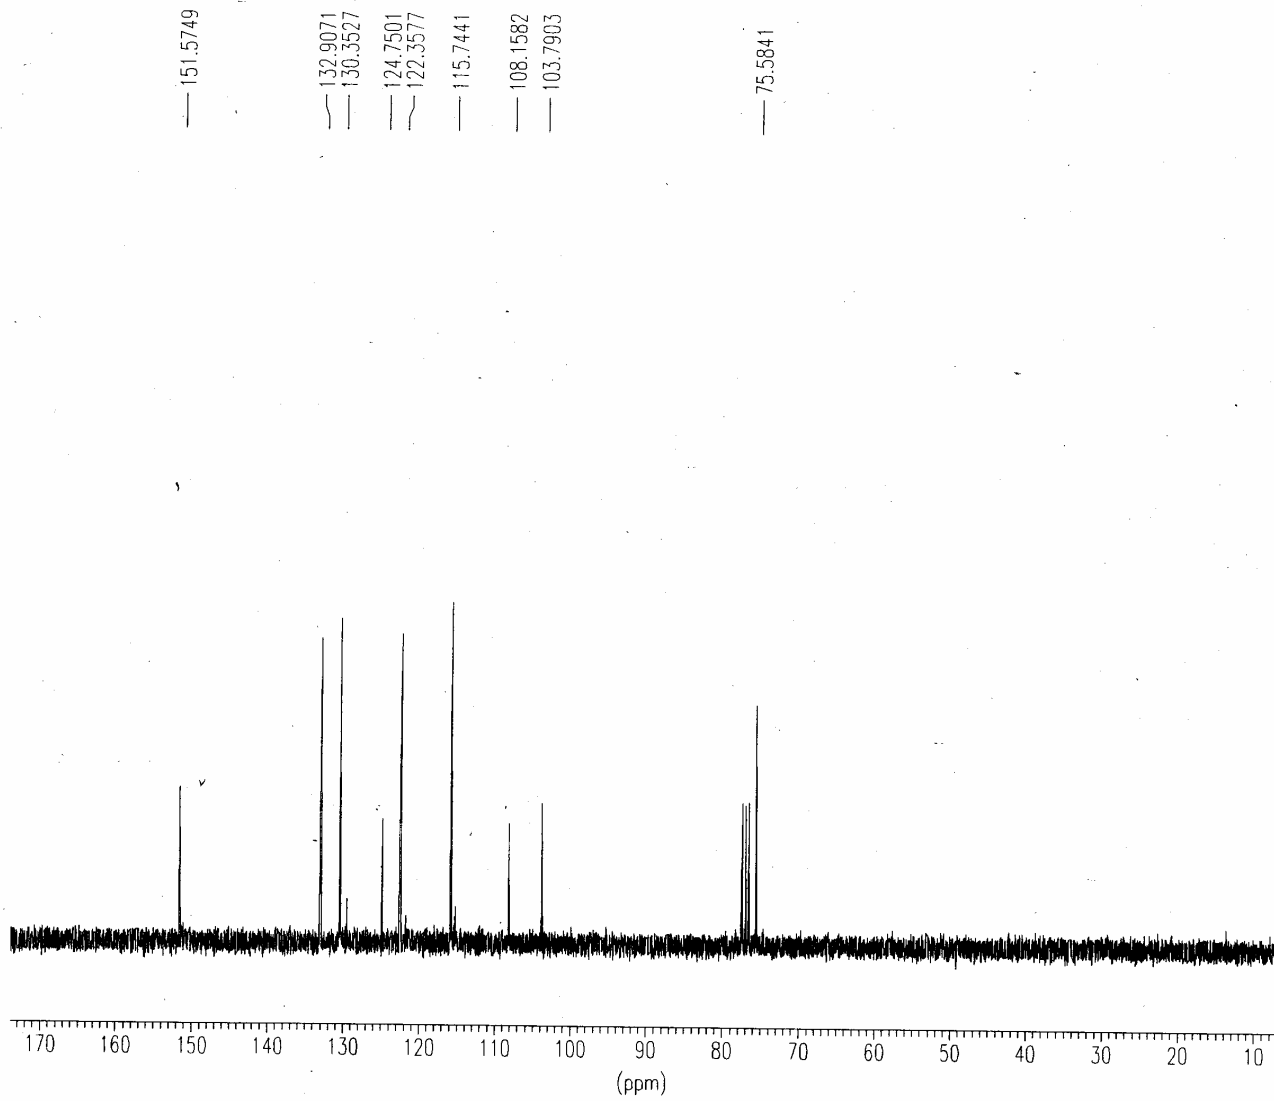

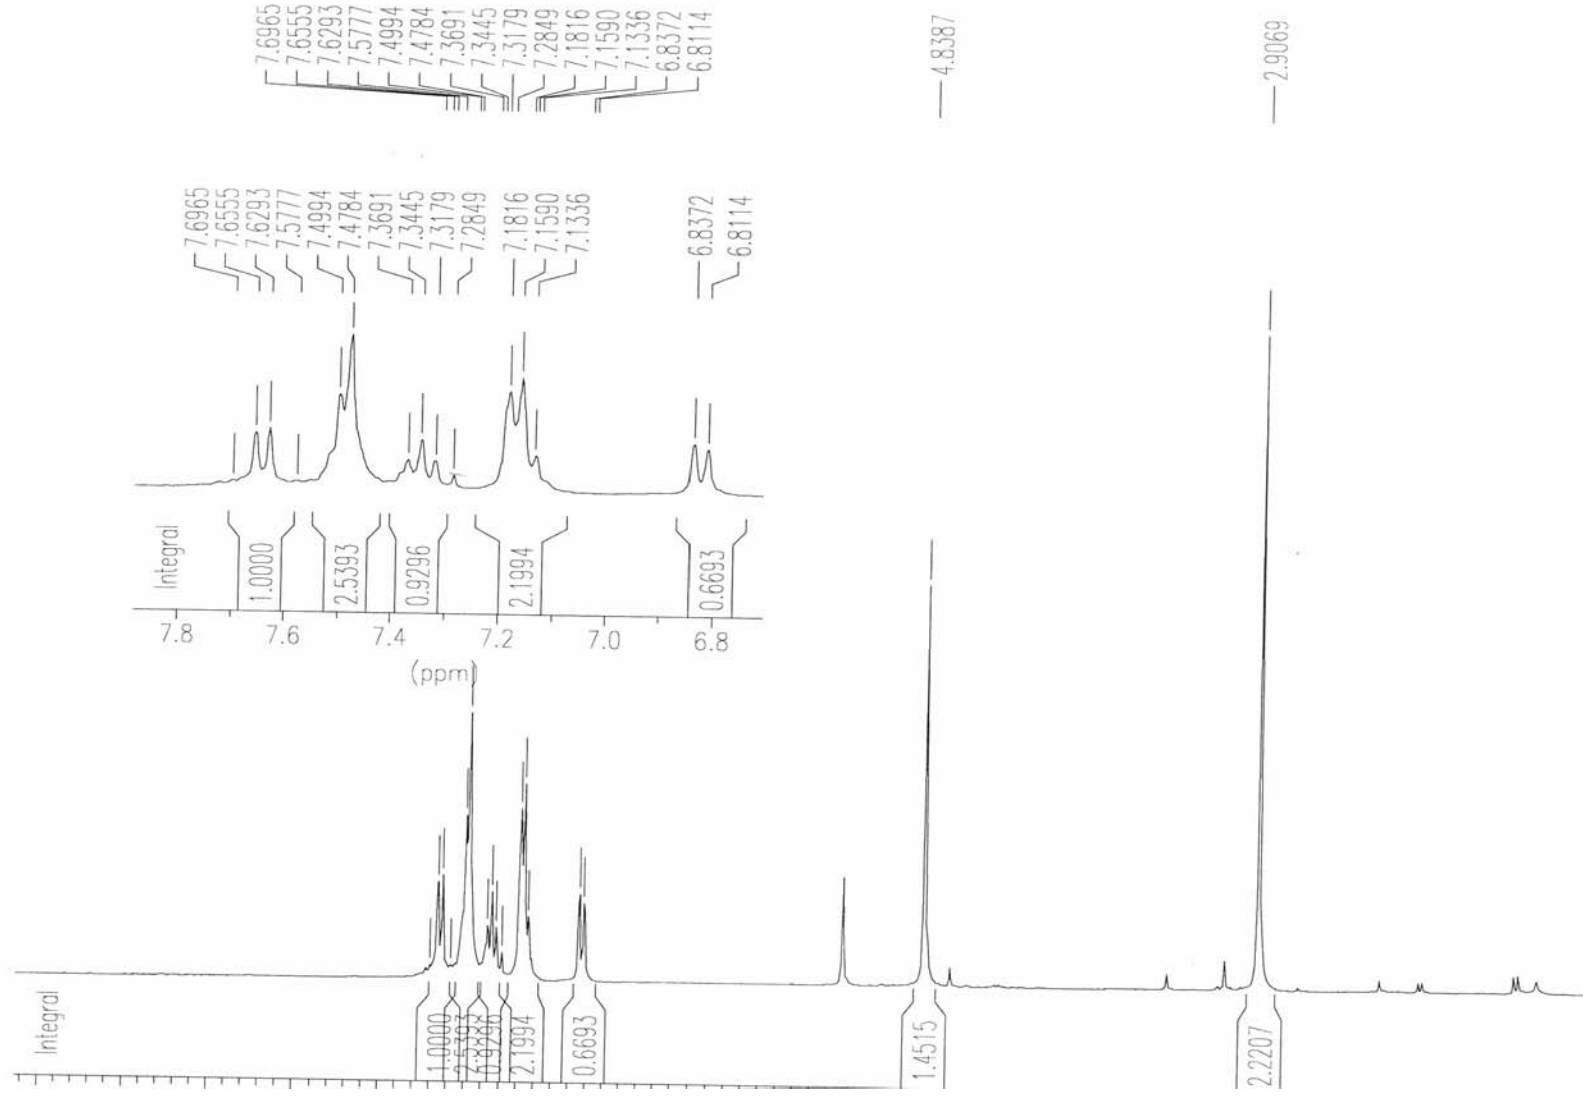



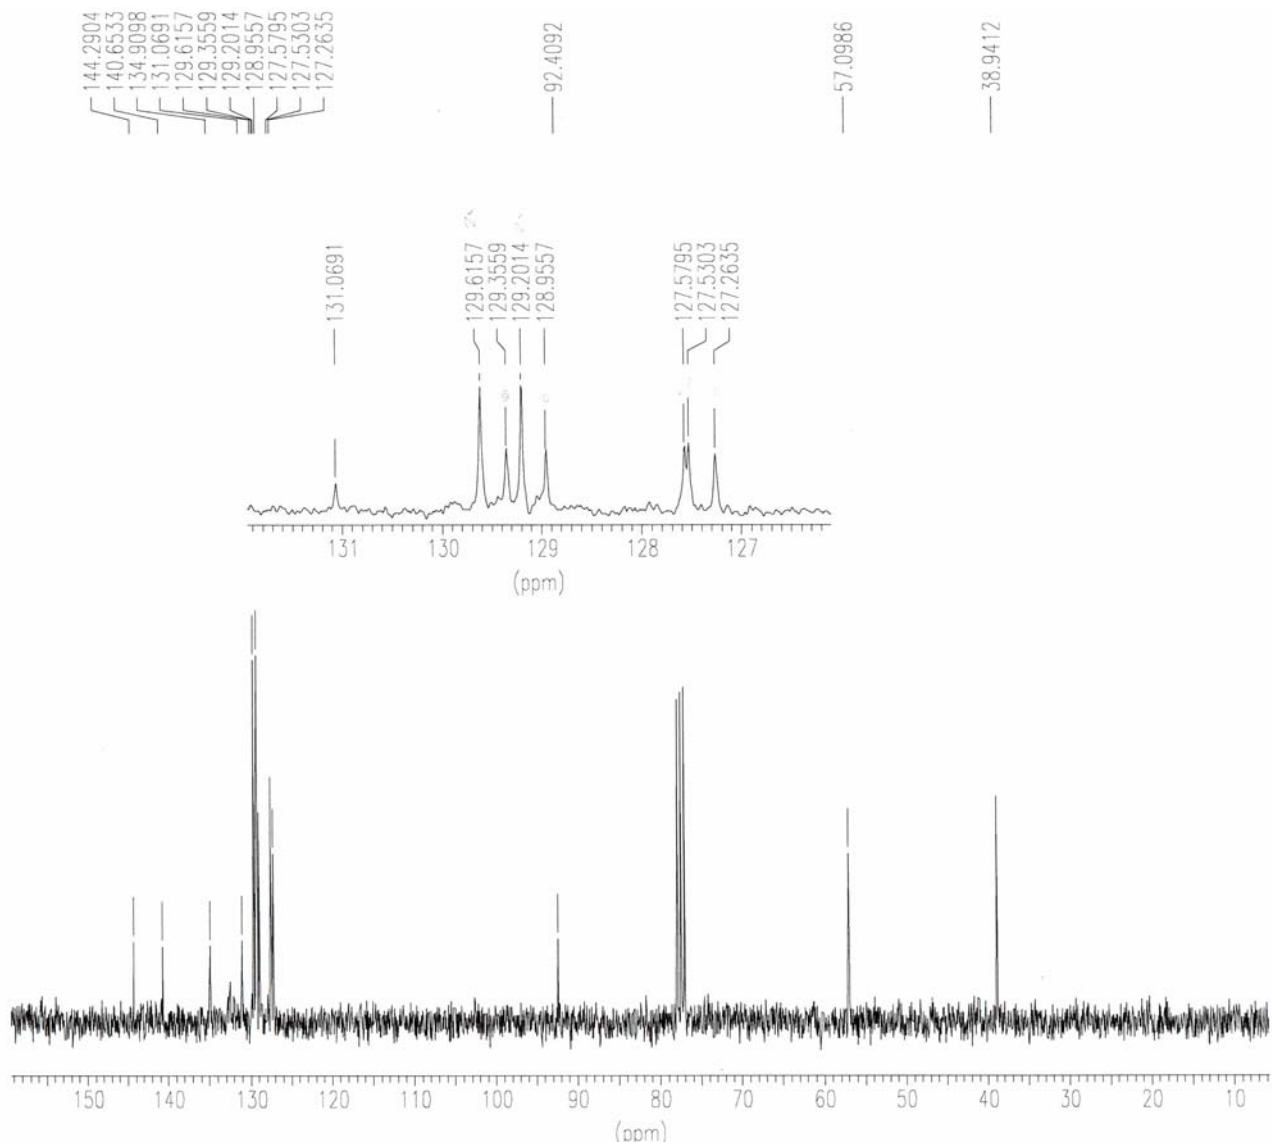

2g

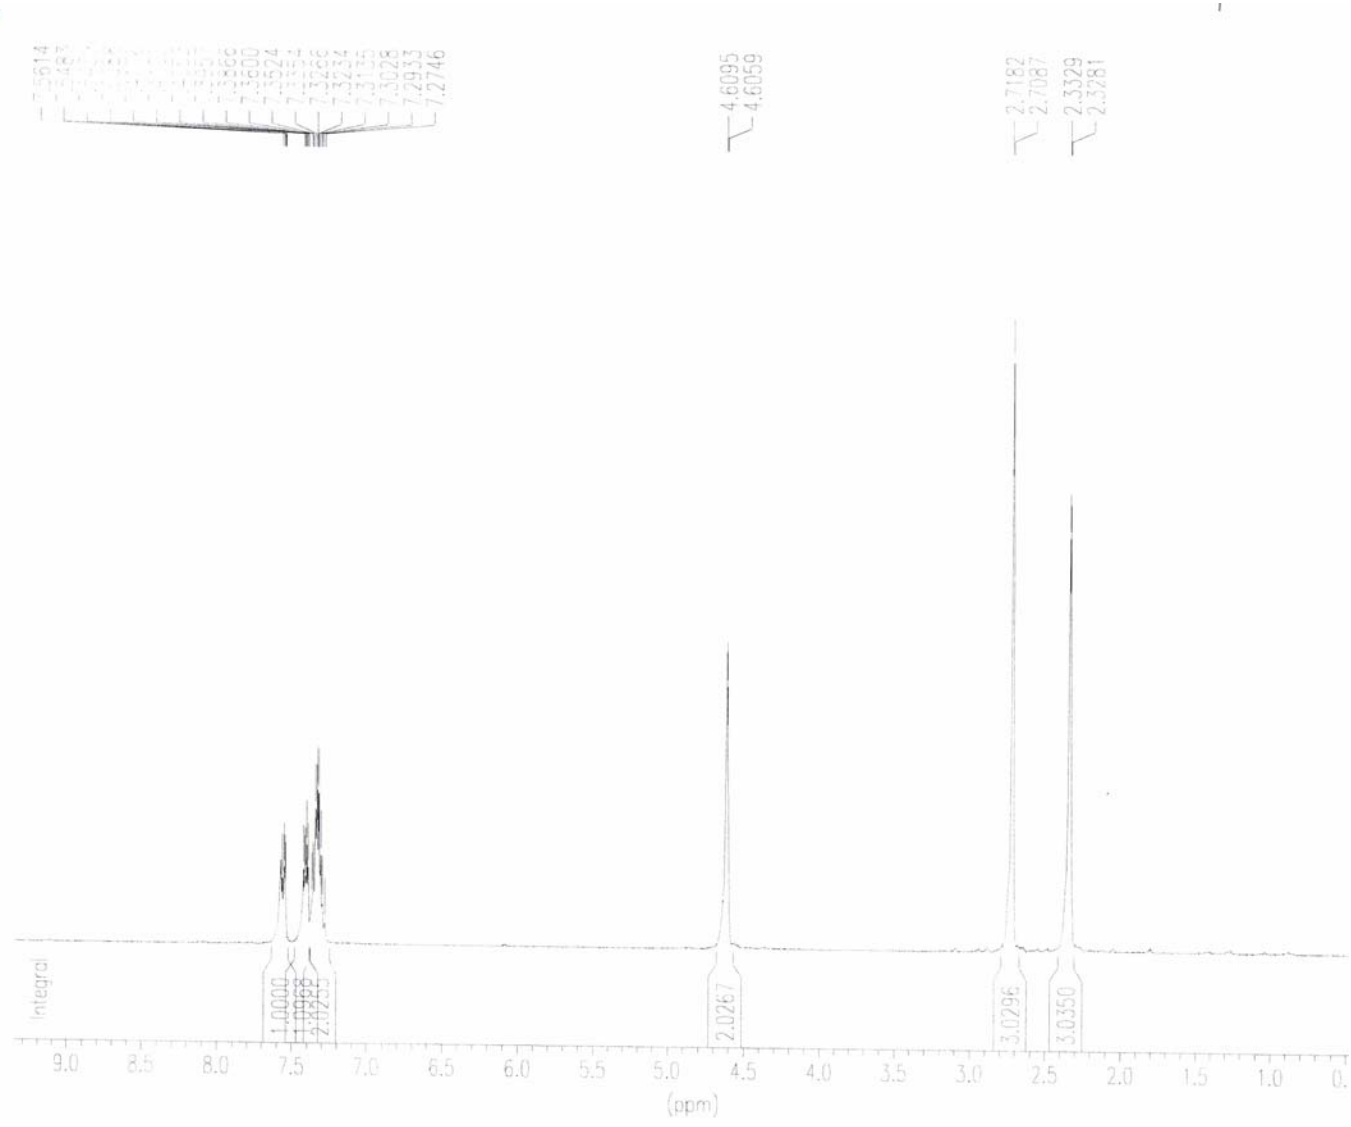

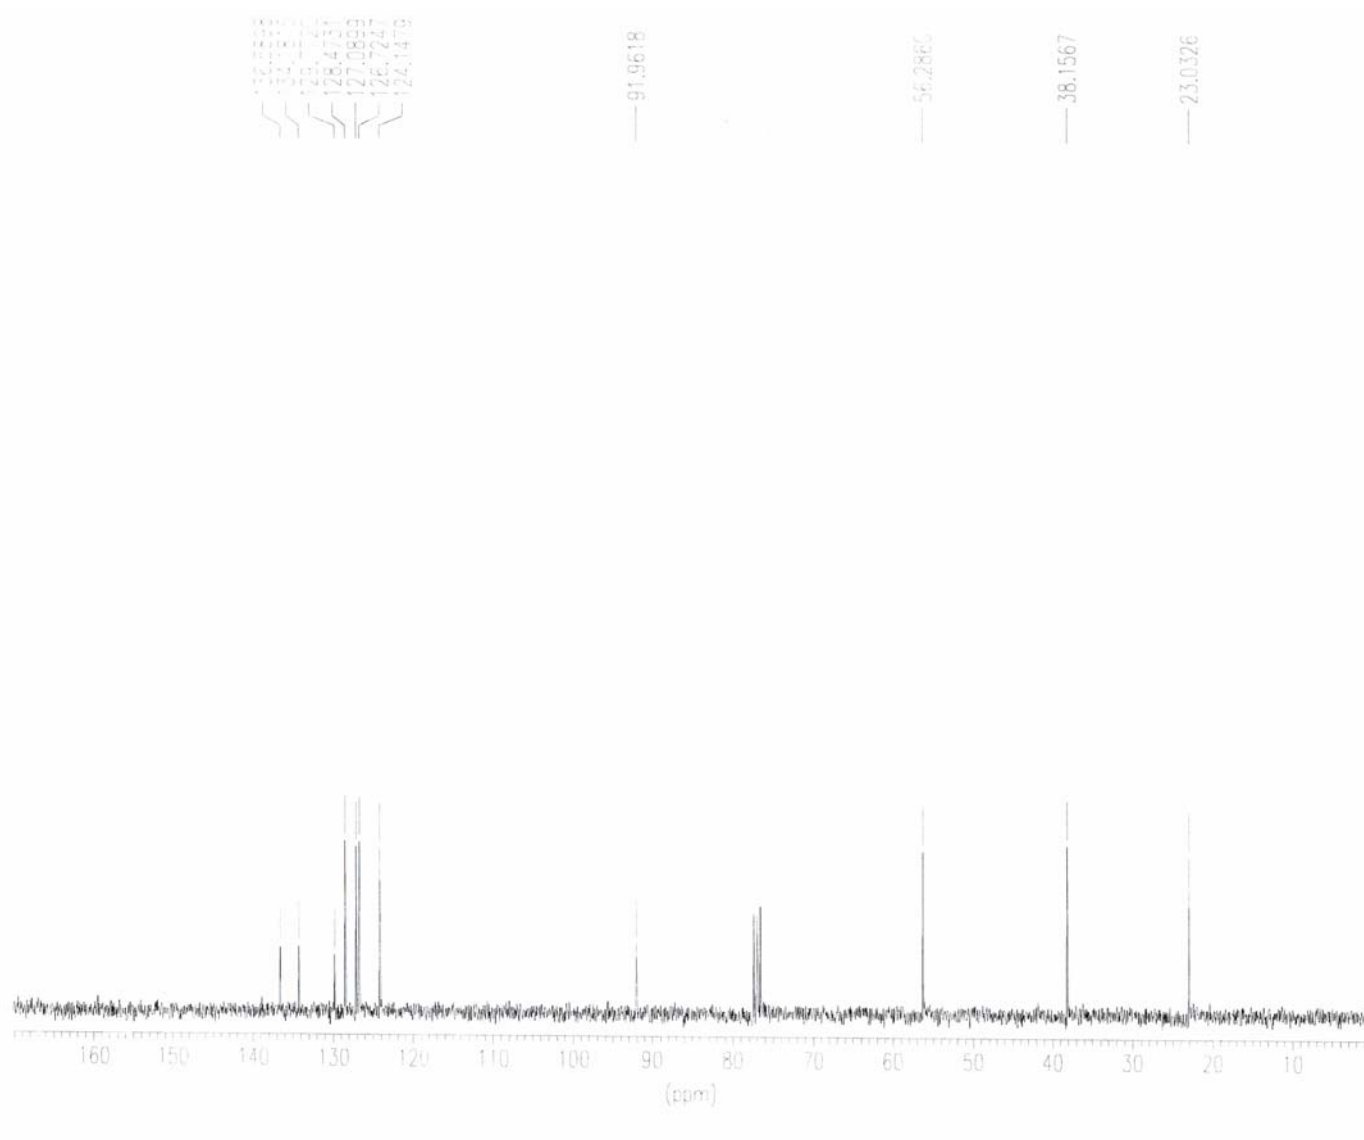

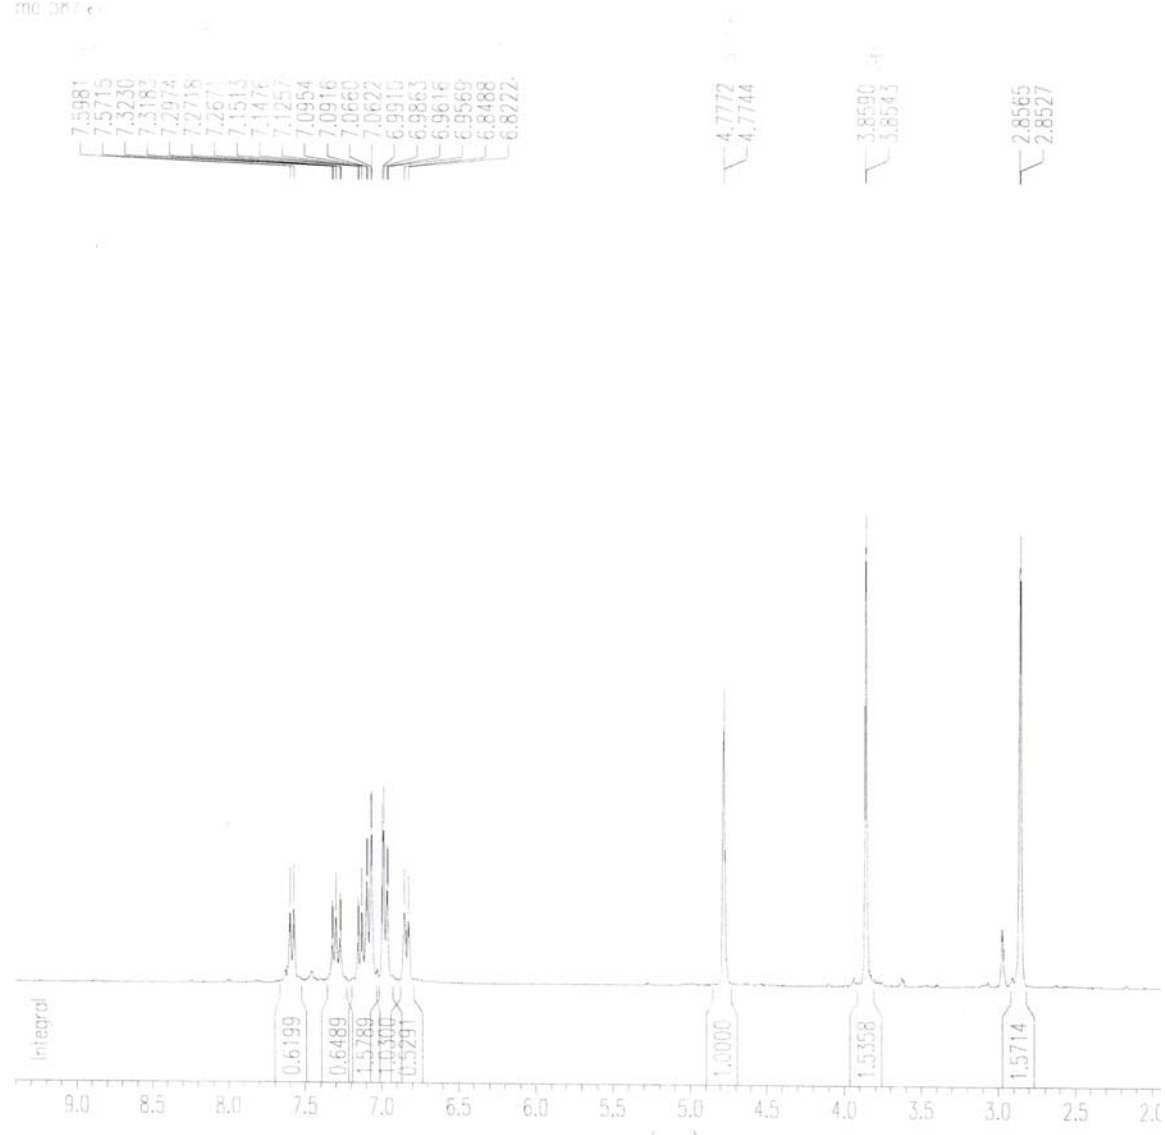

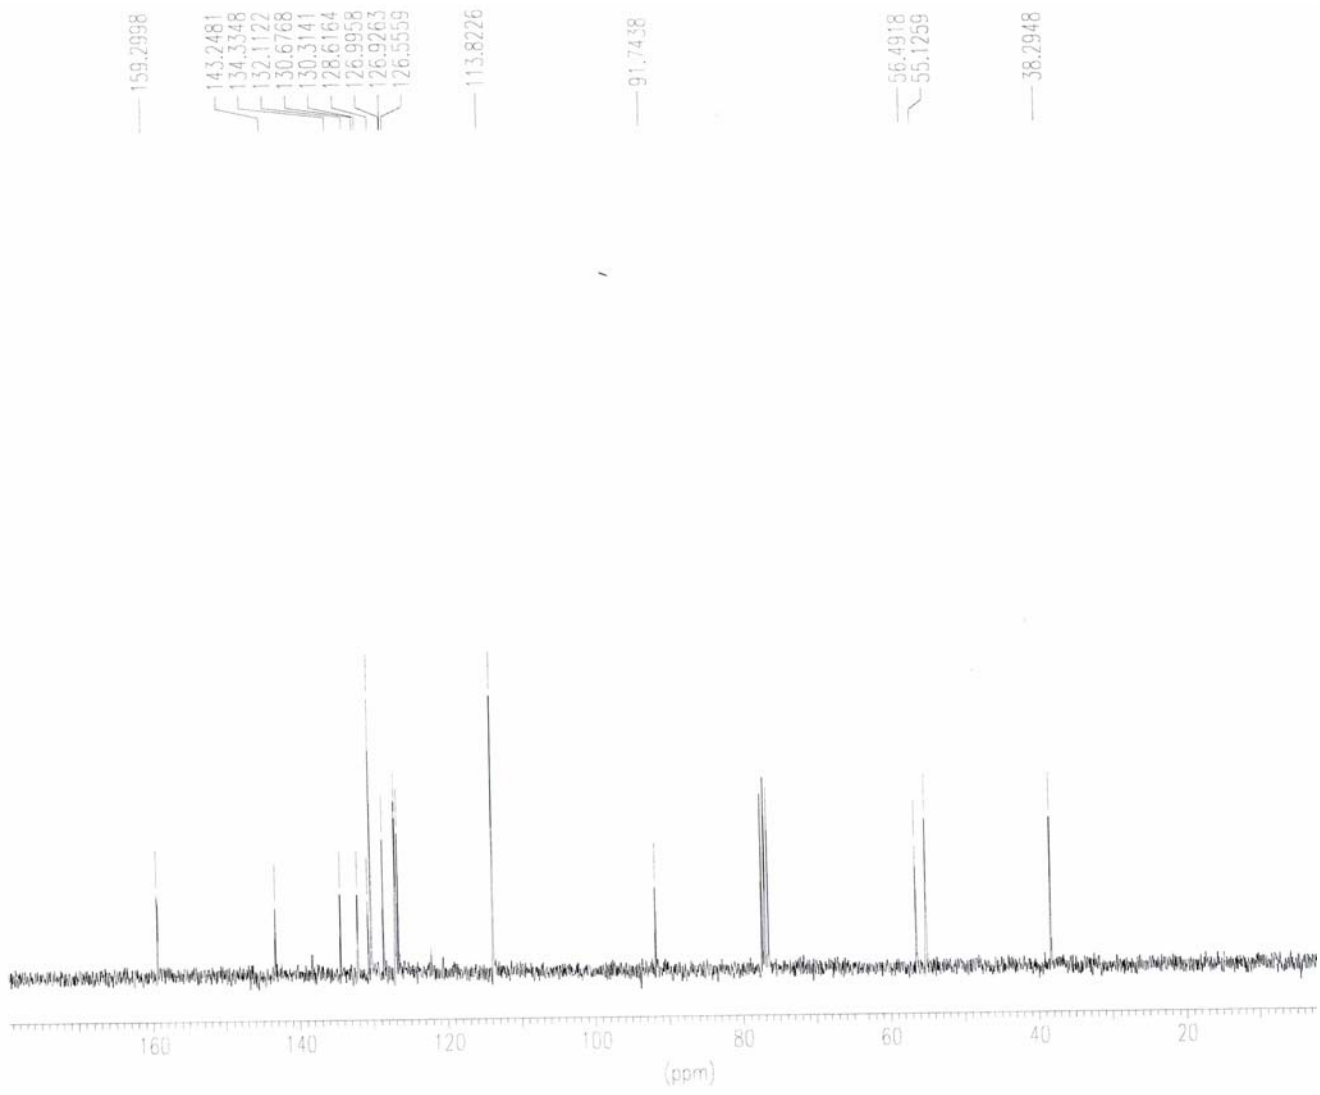

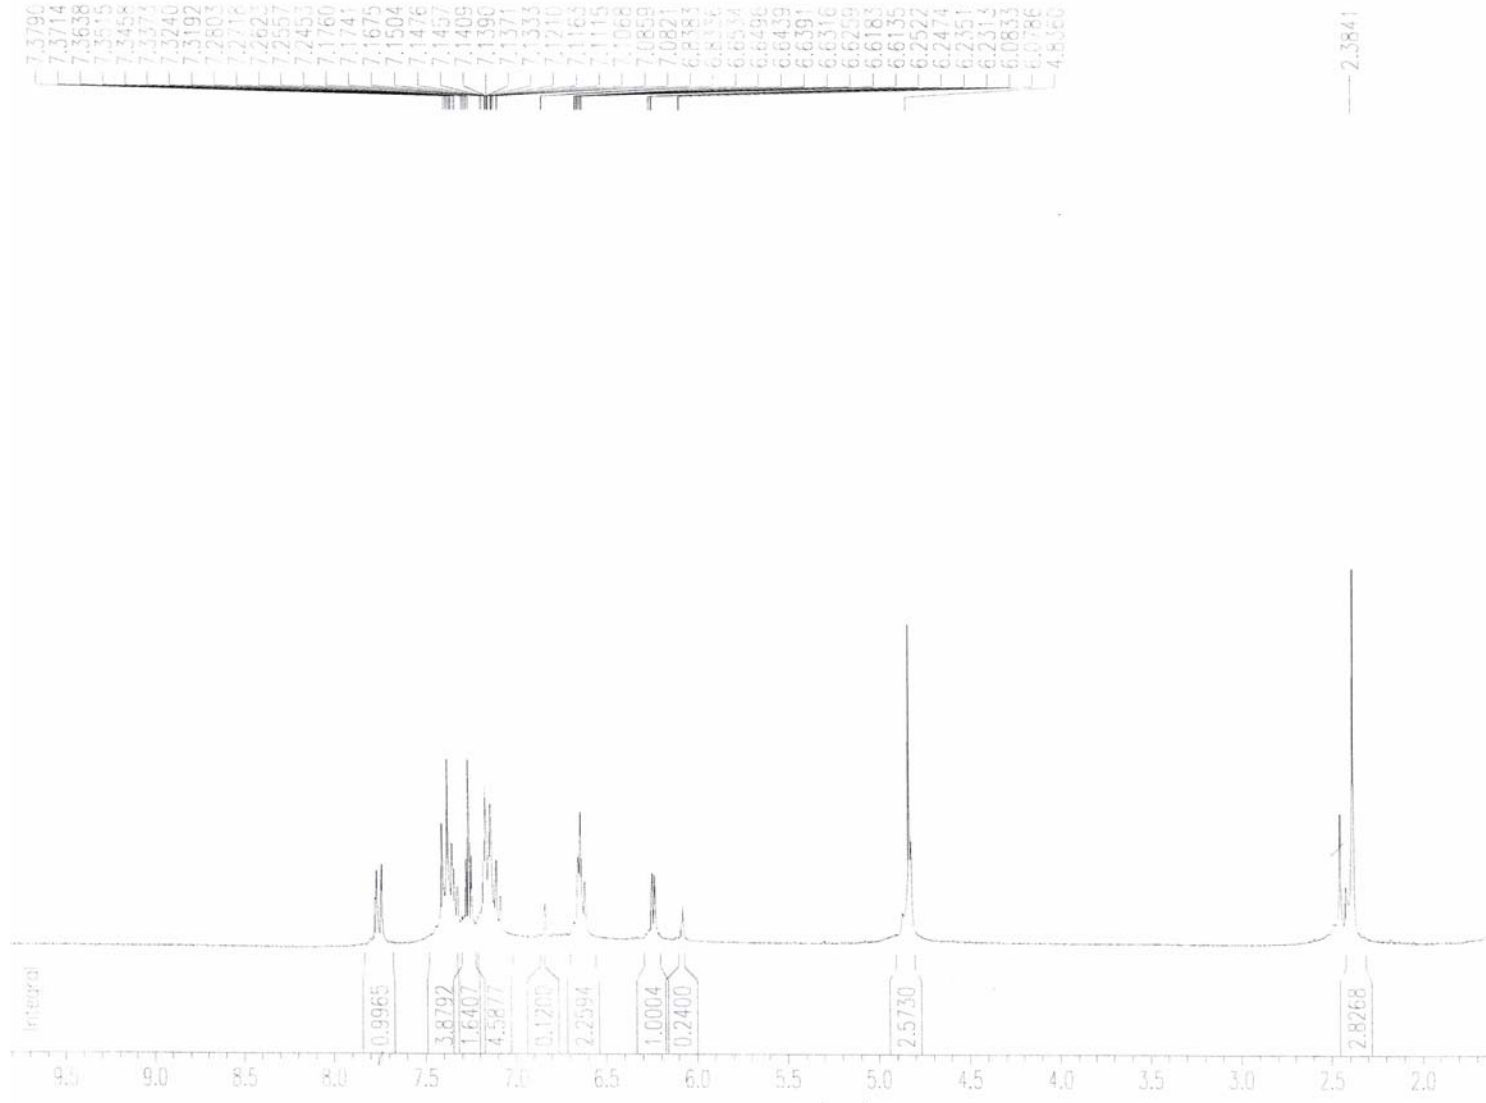

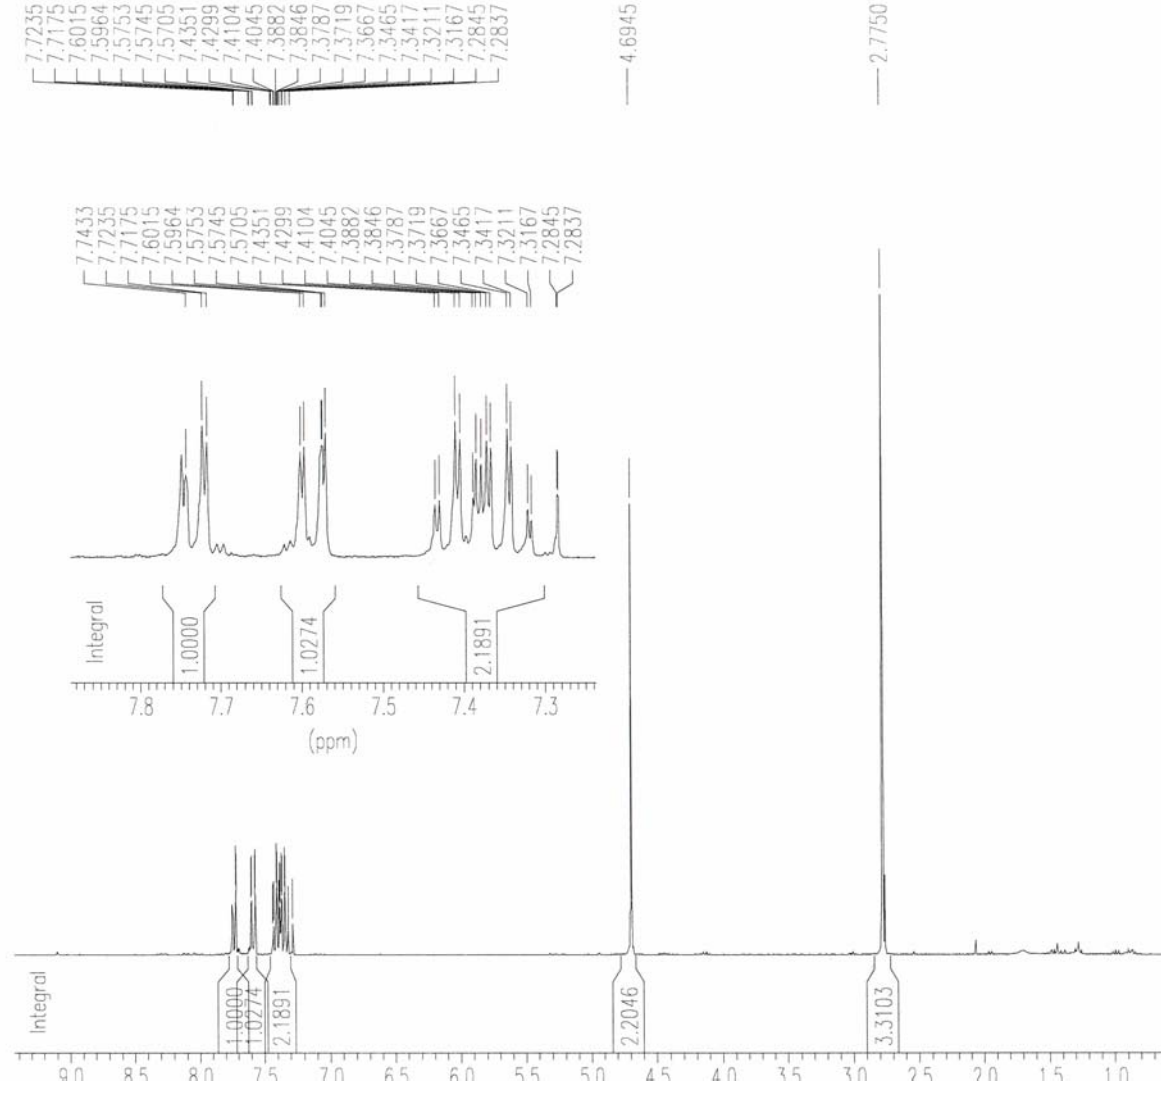

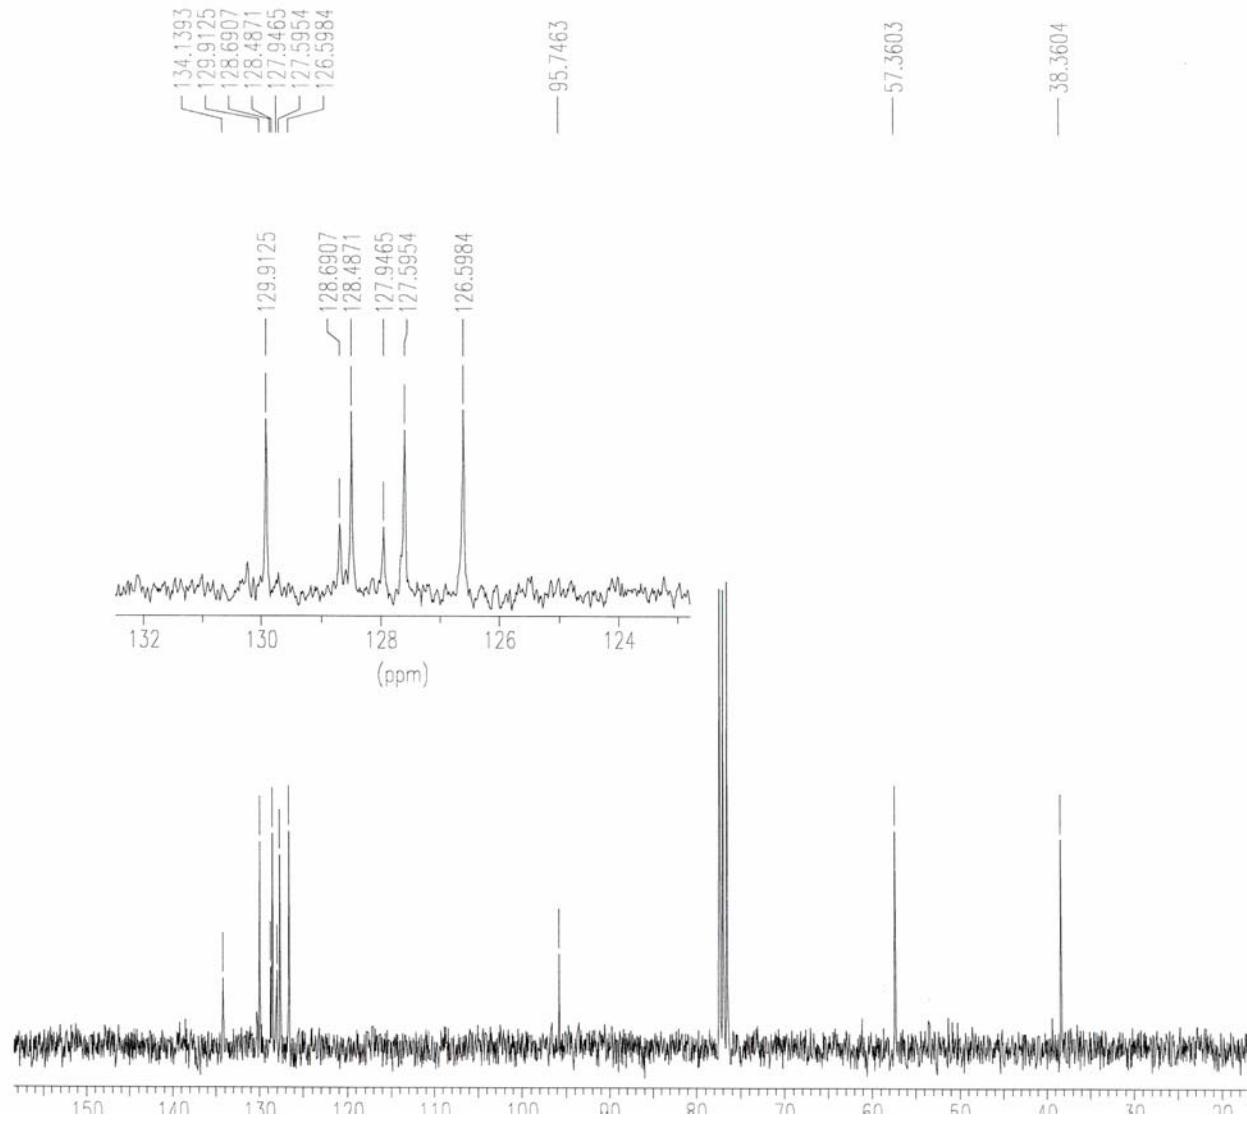



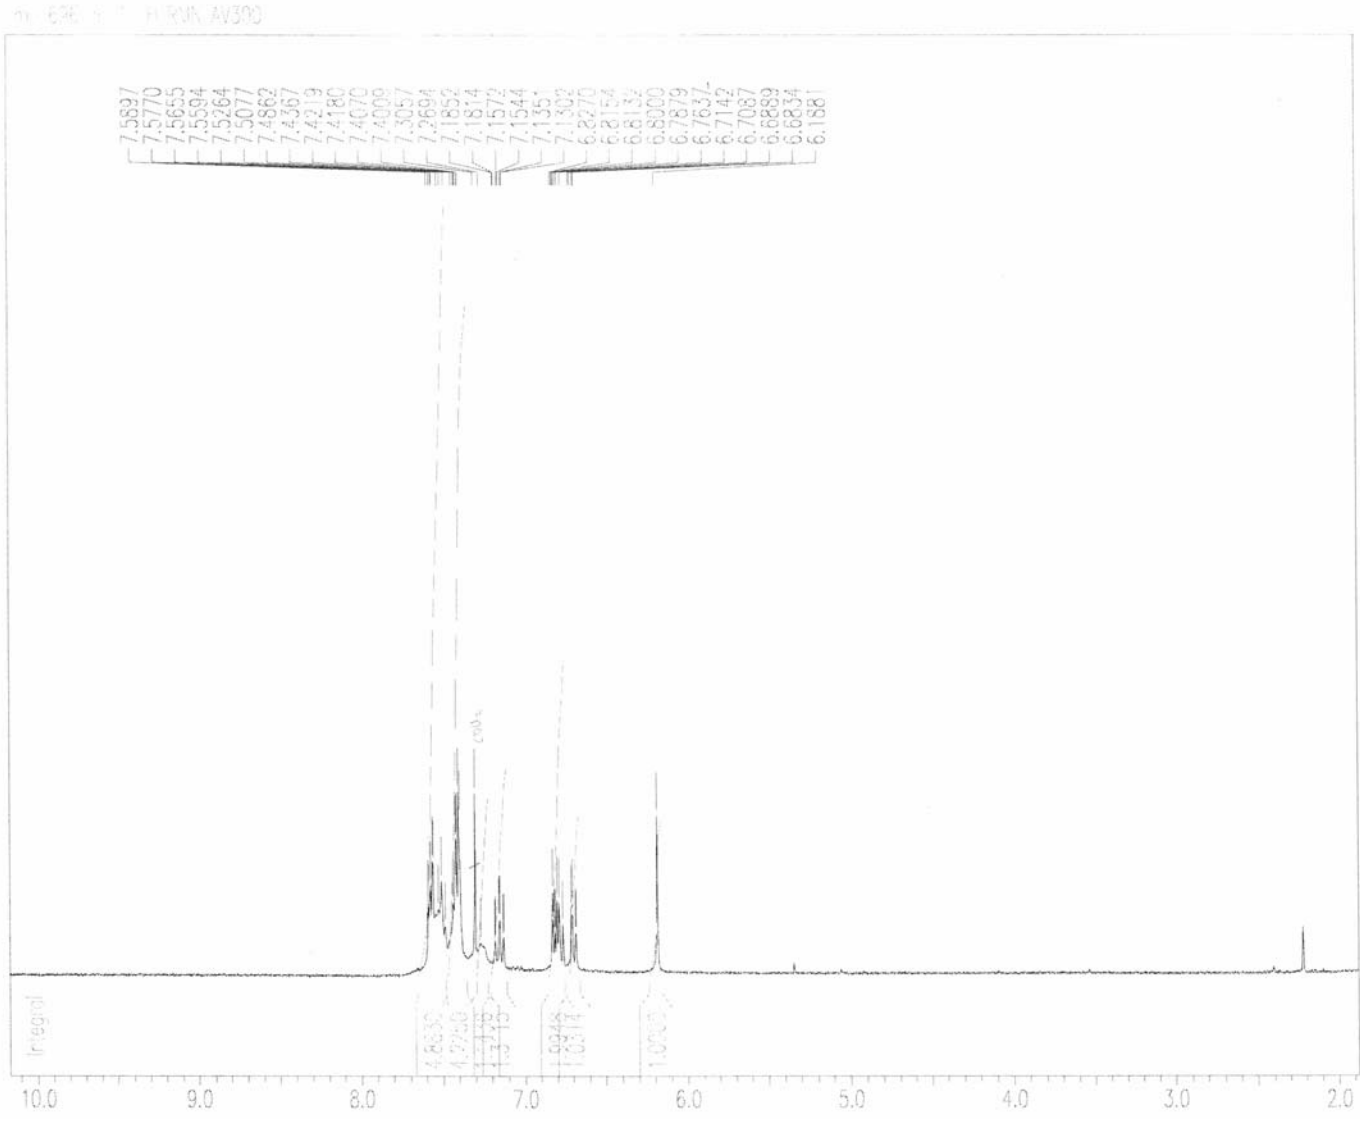

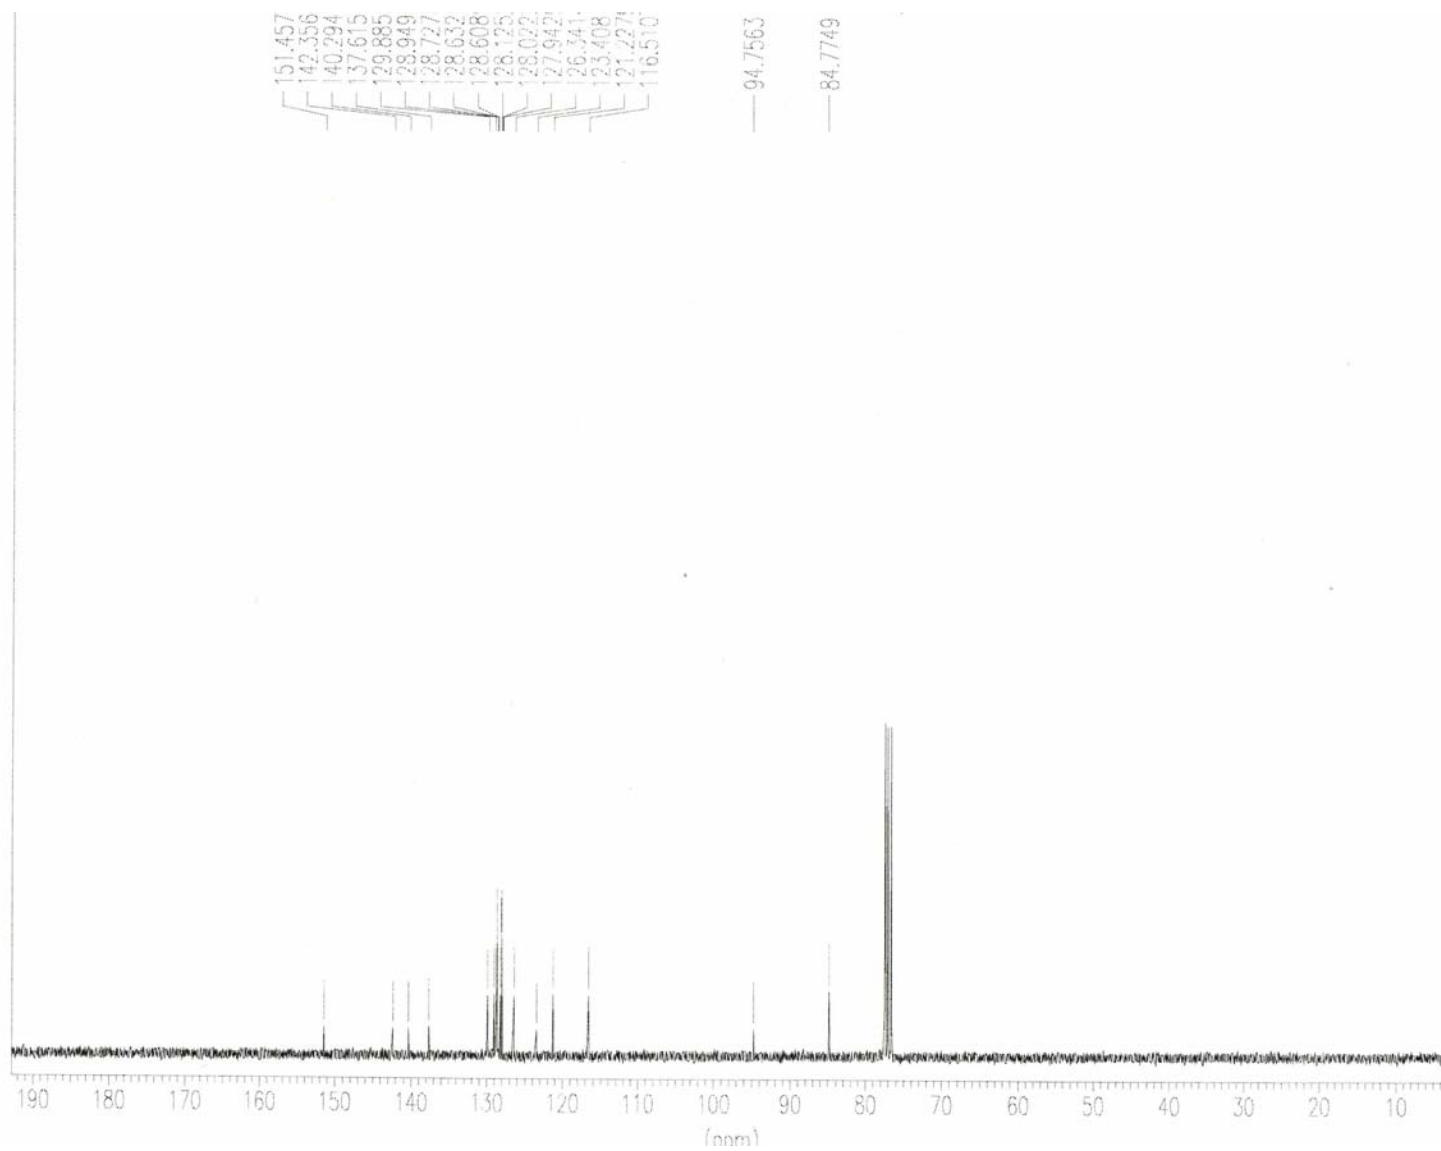

4a

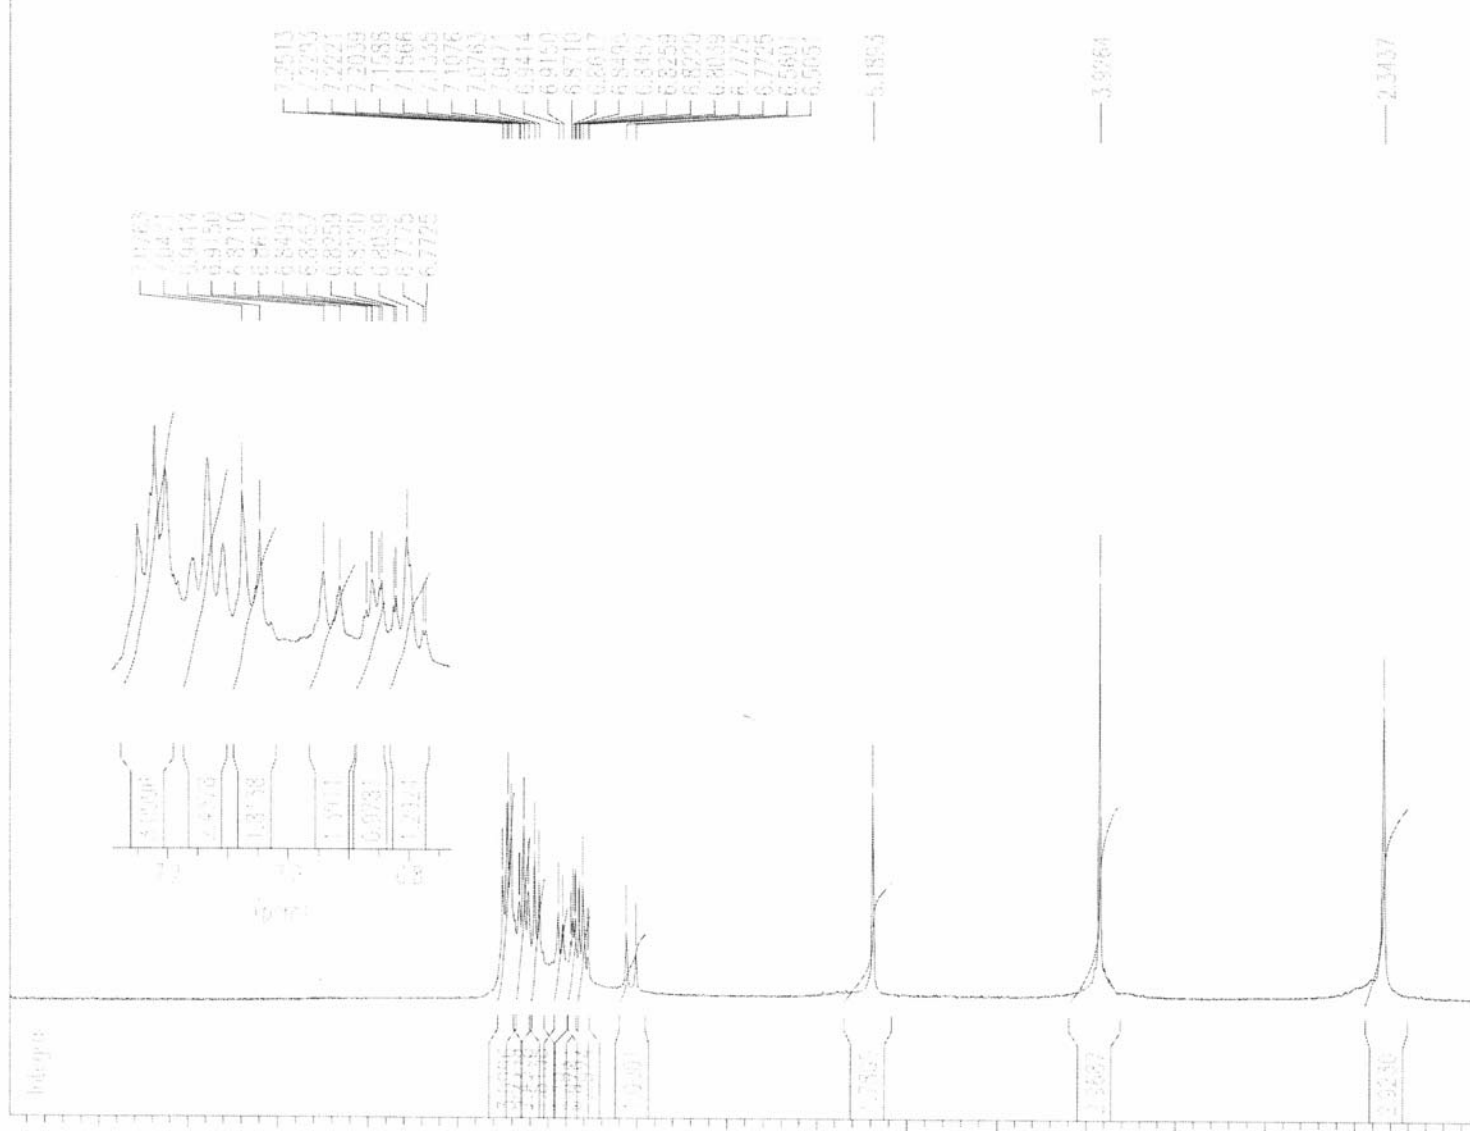

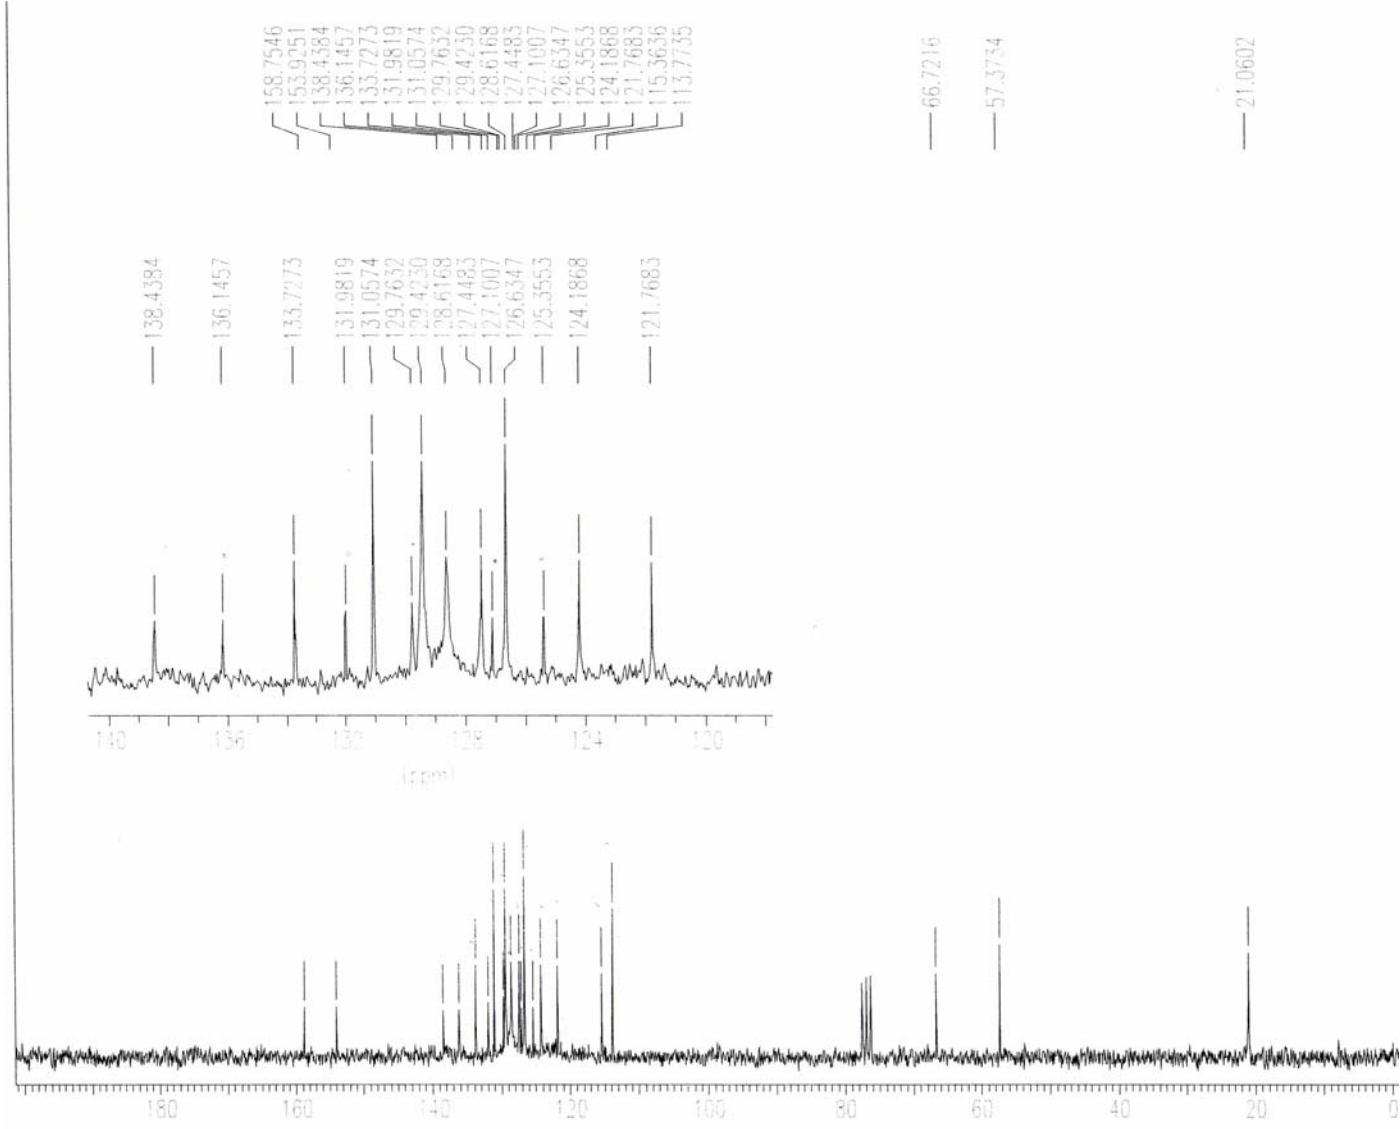



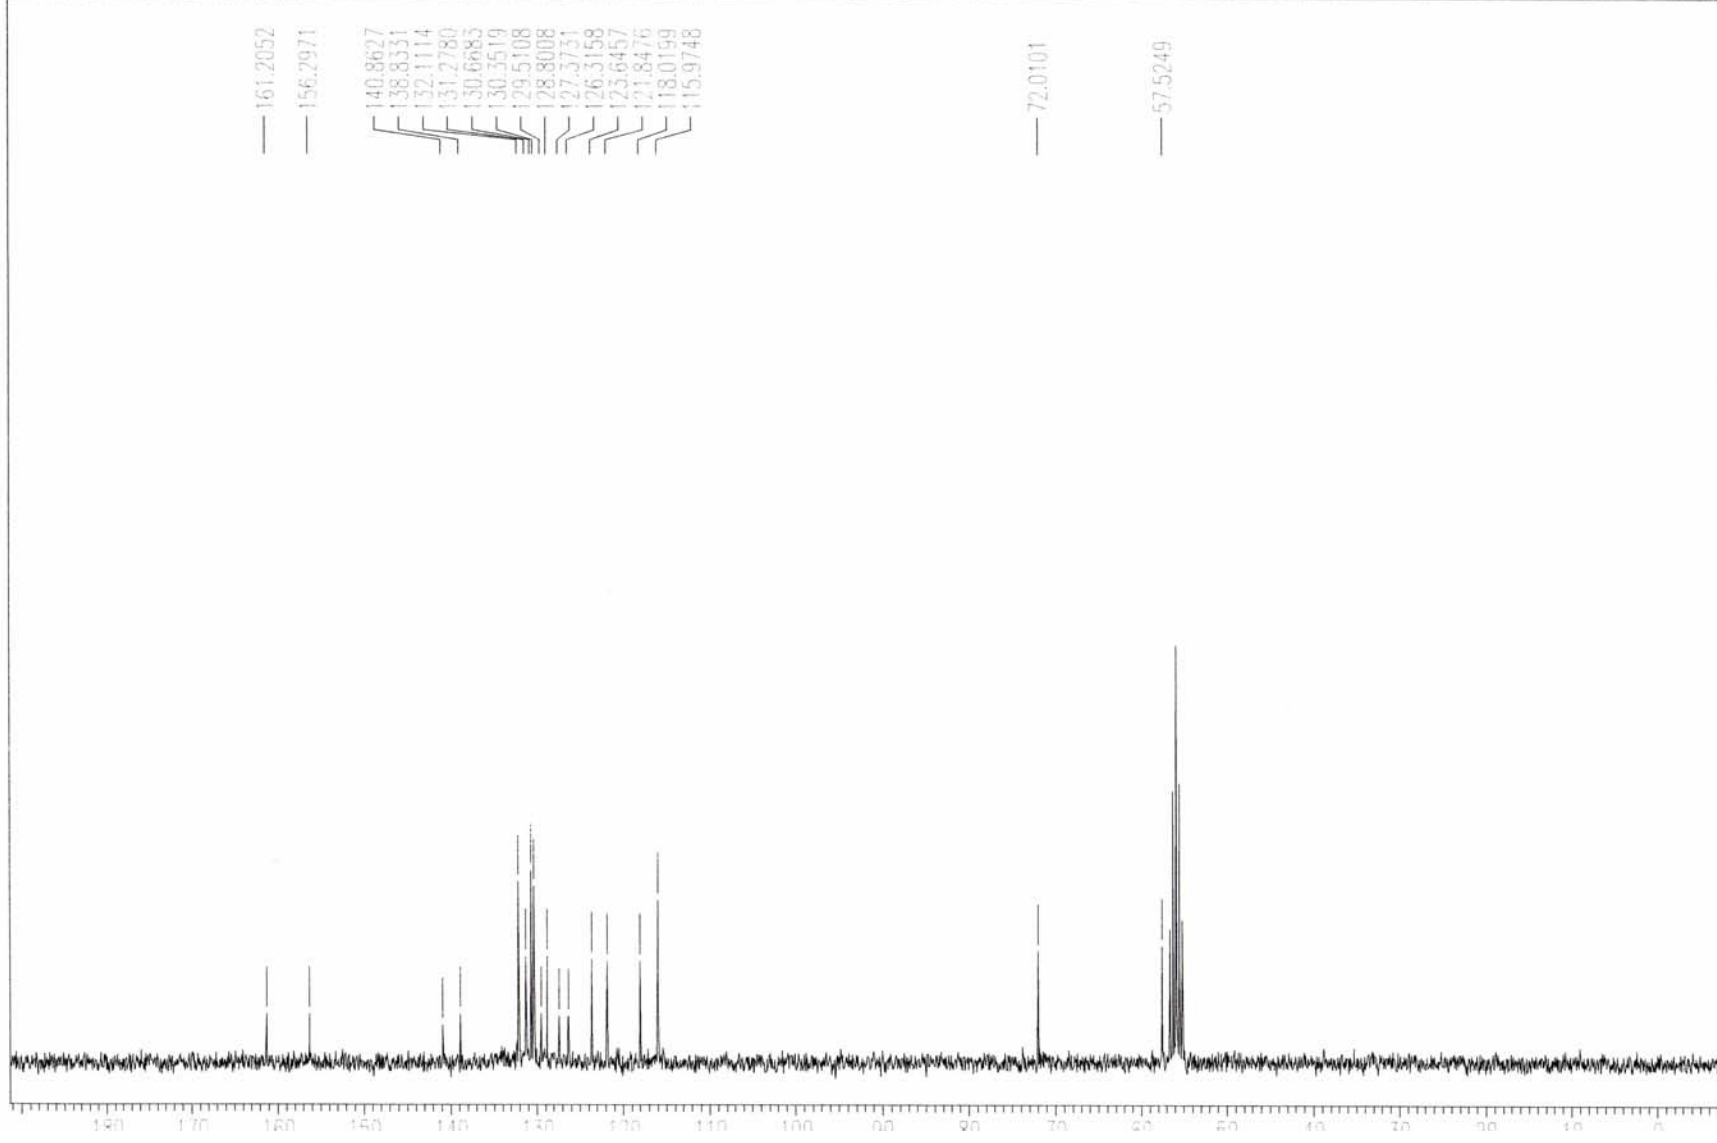



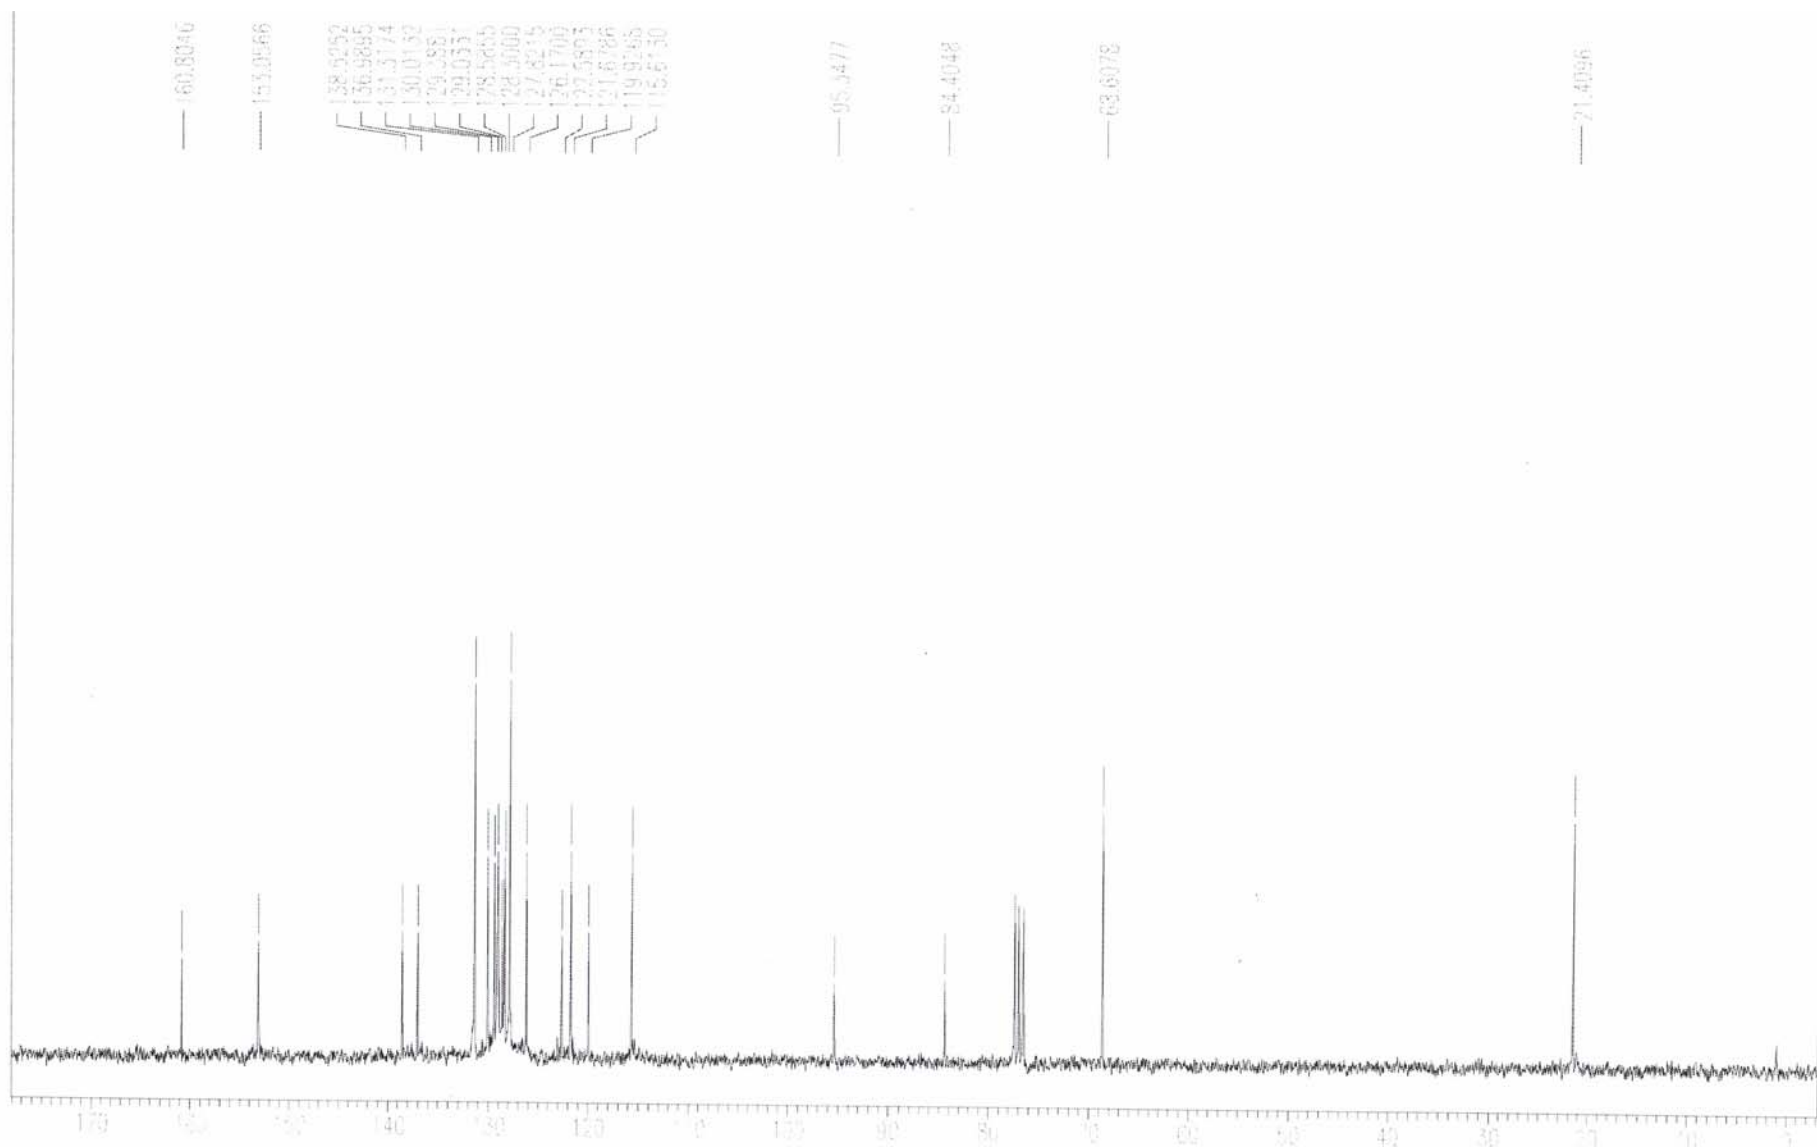



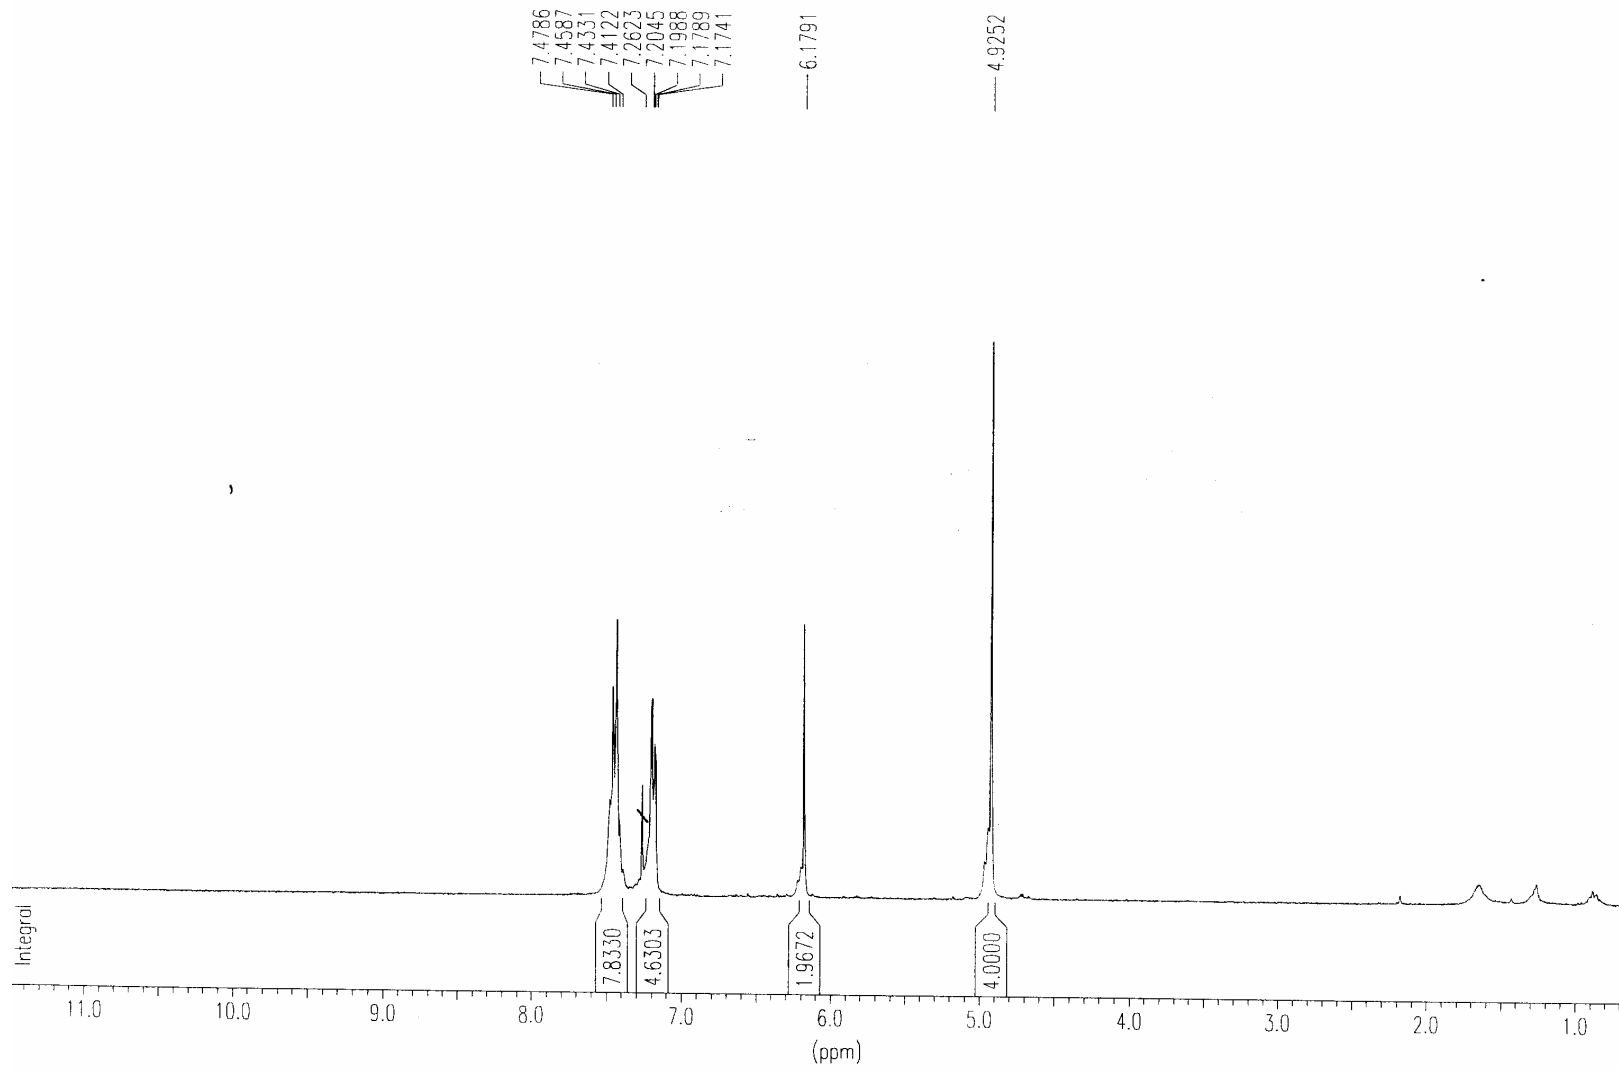

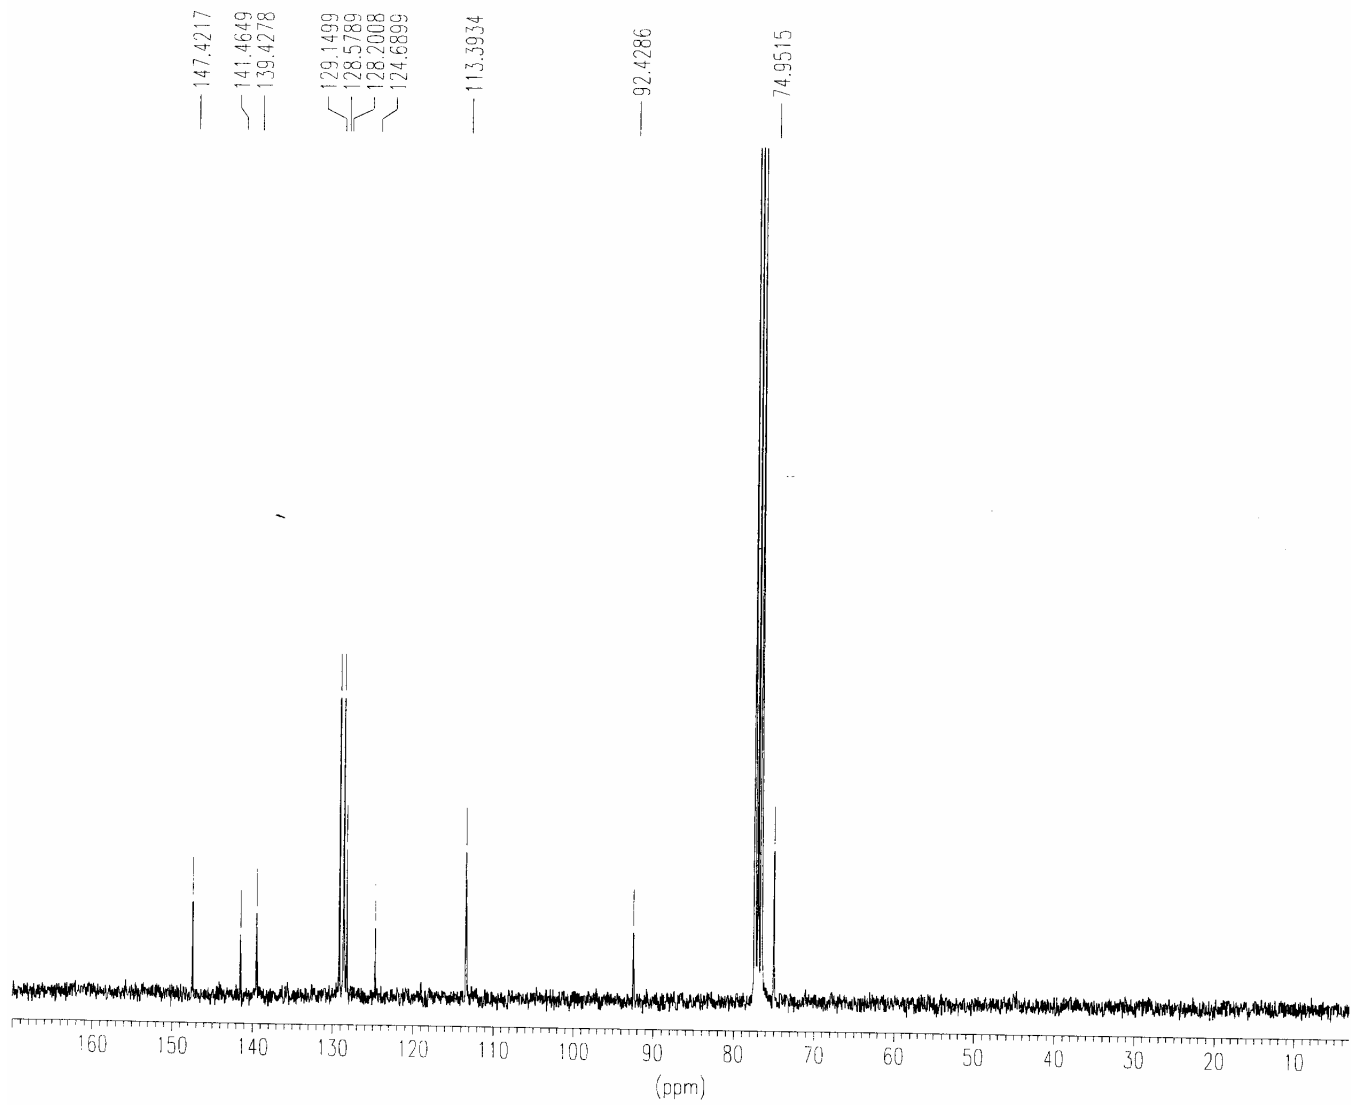

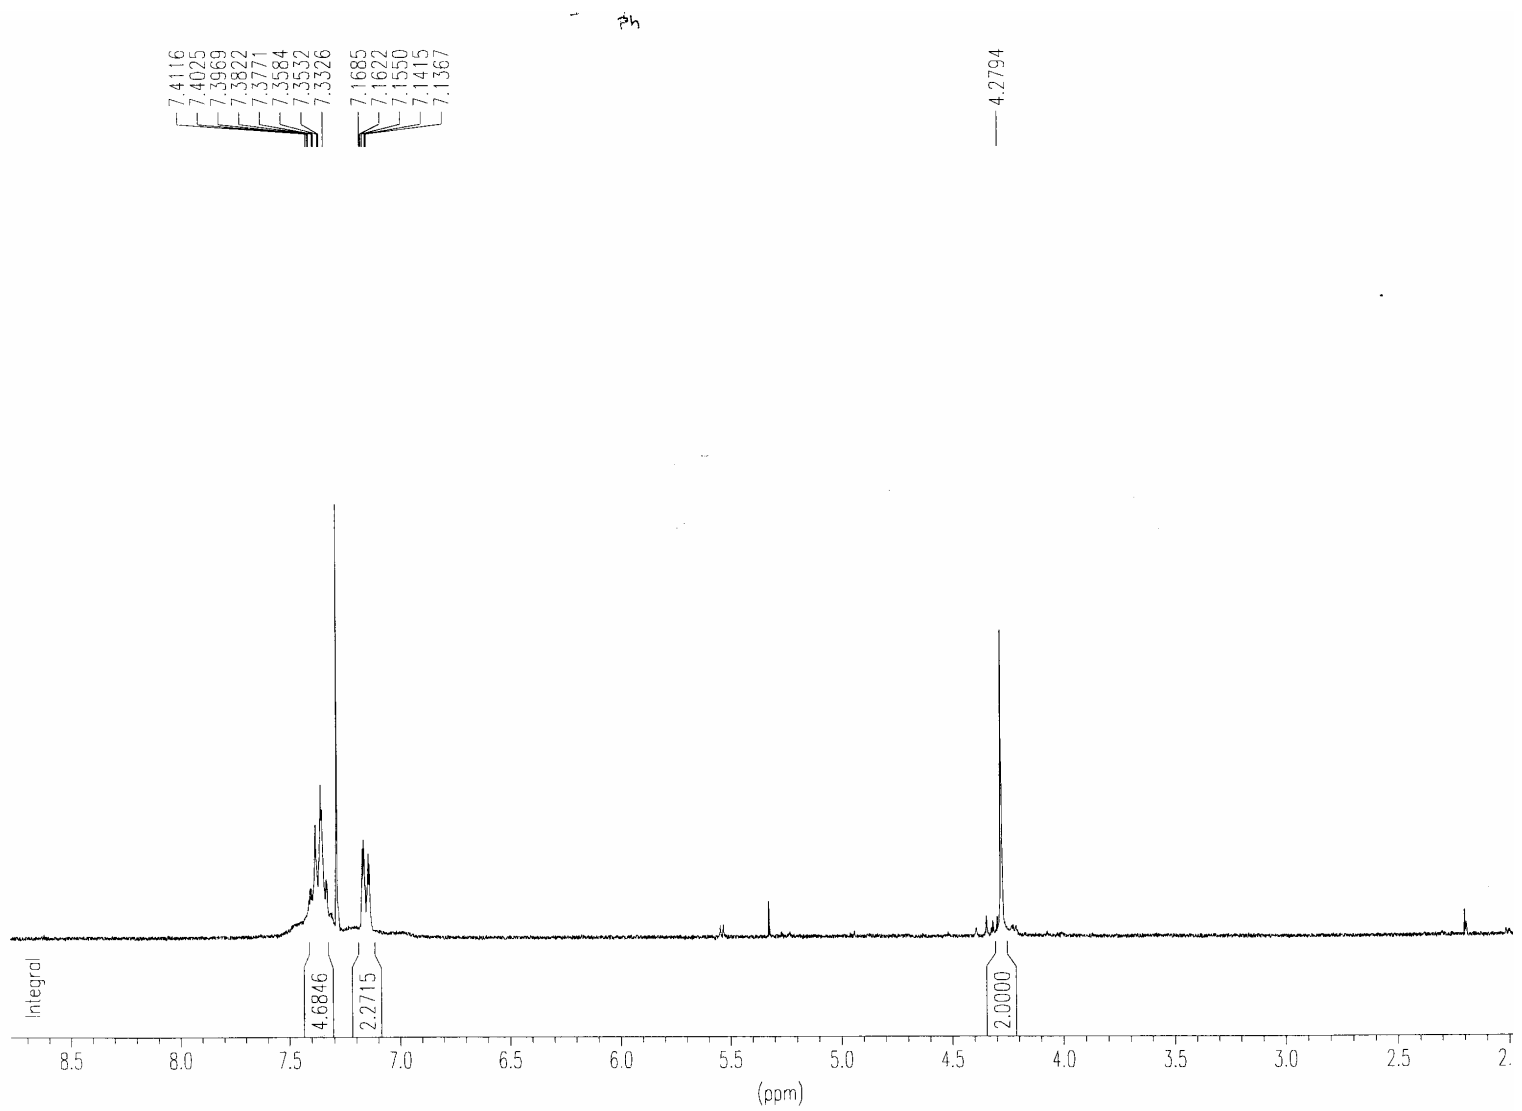

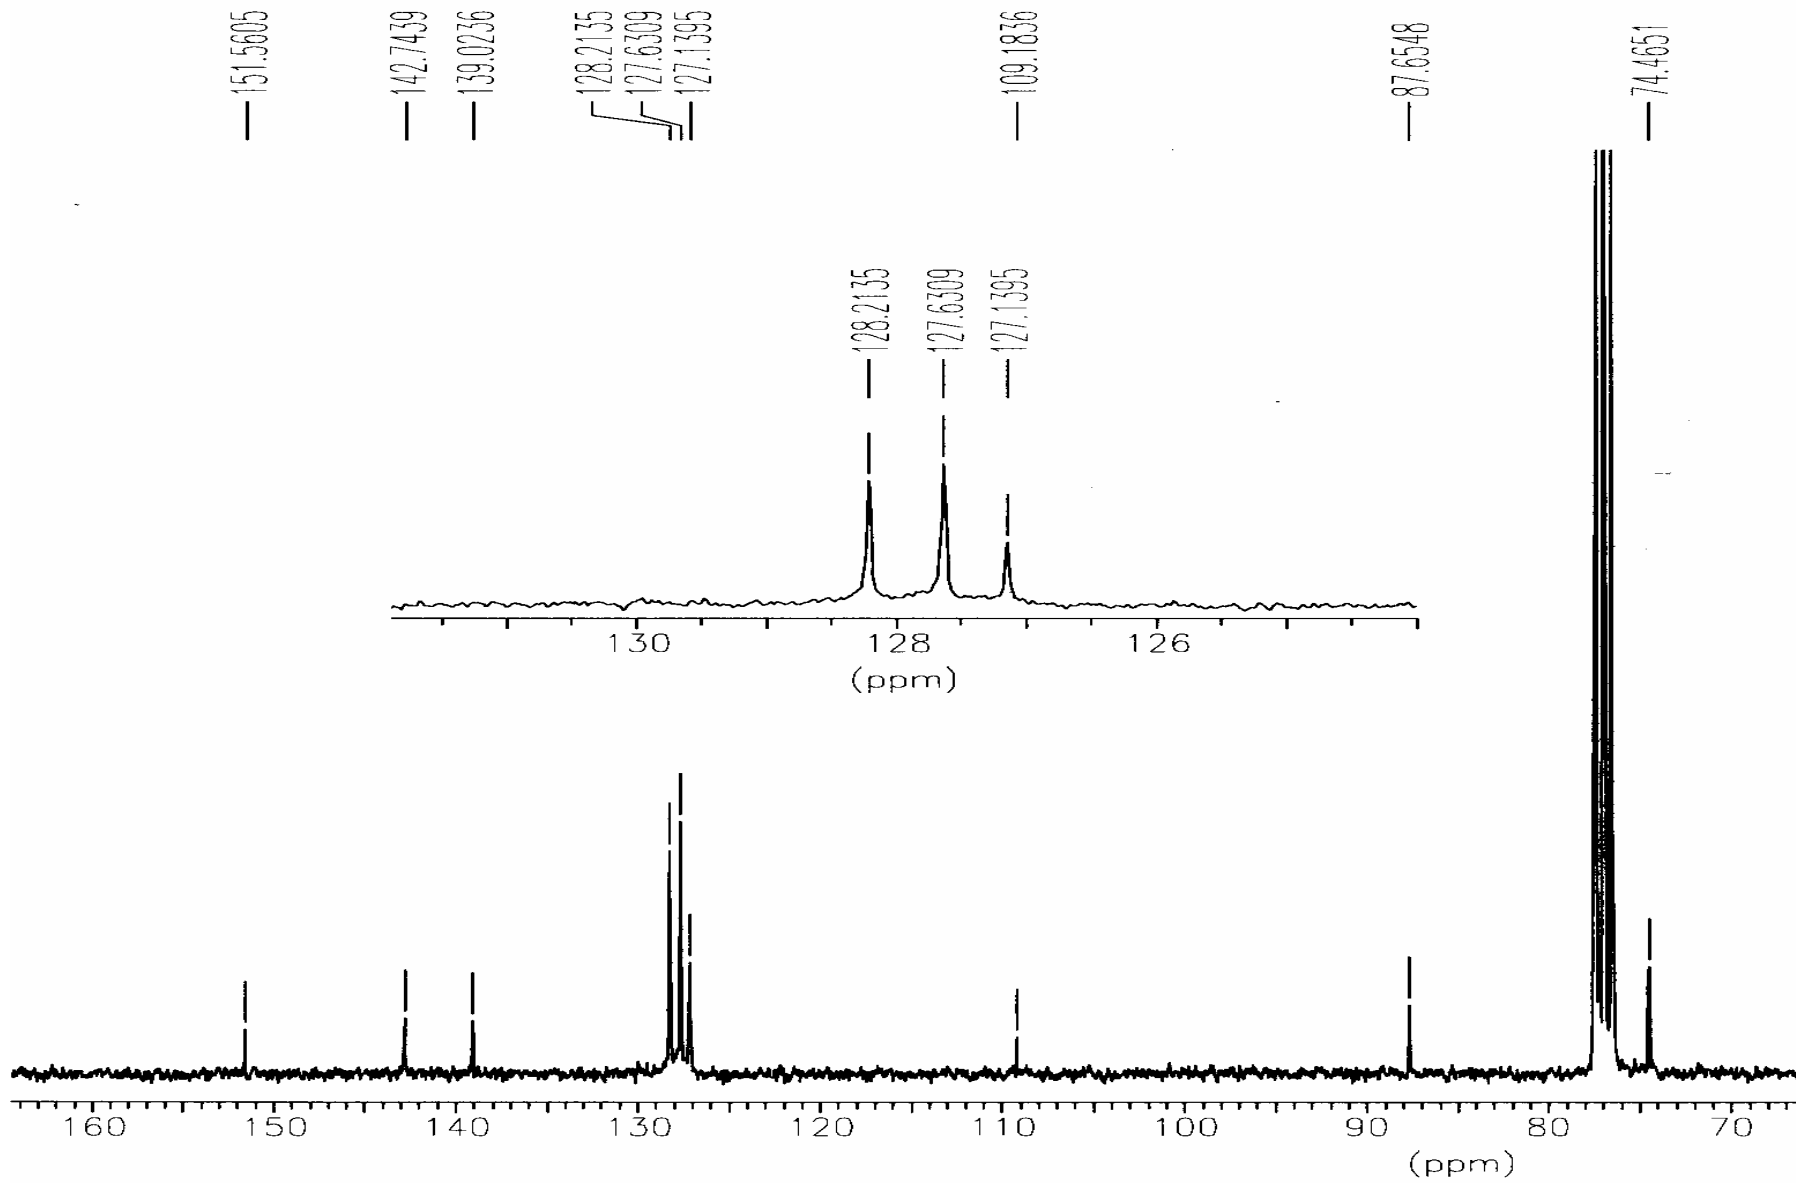

2k

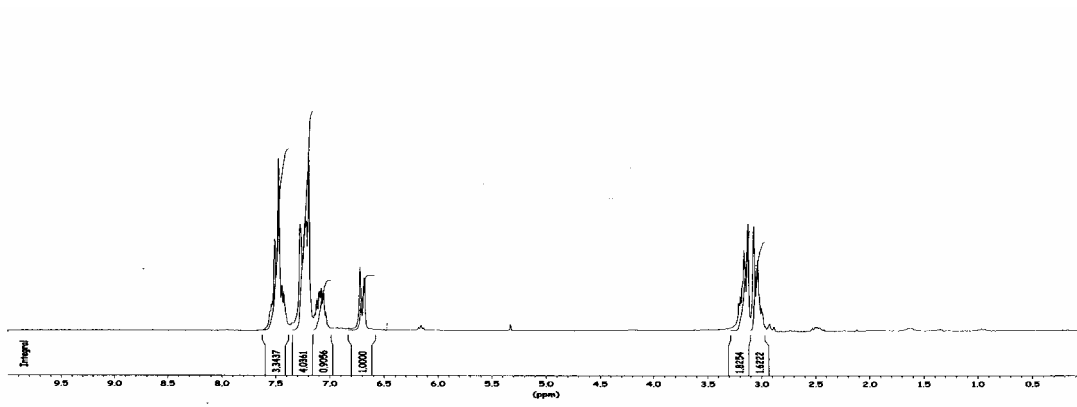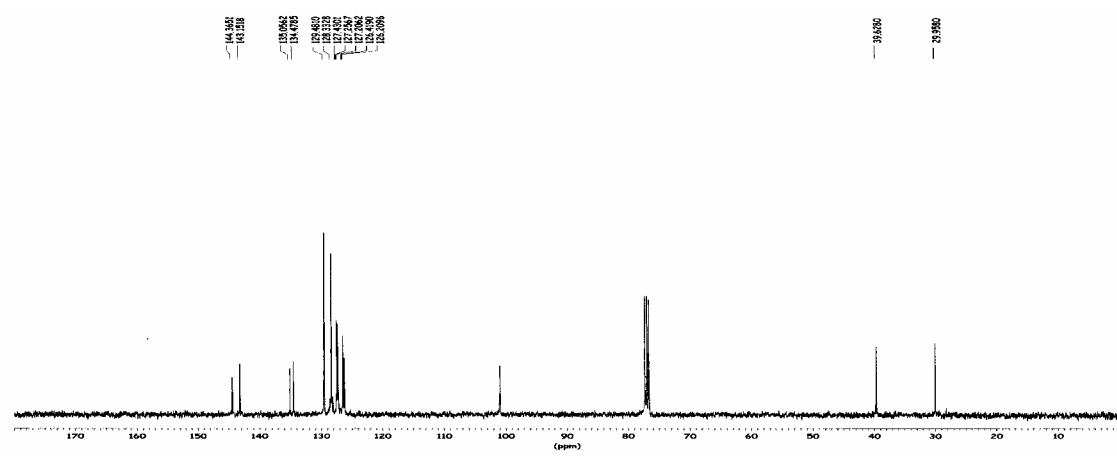

2m

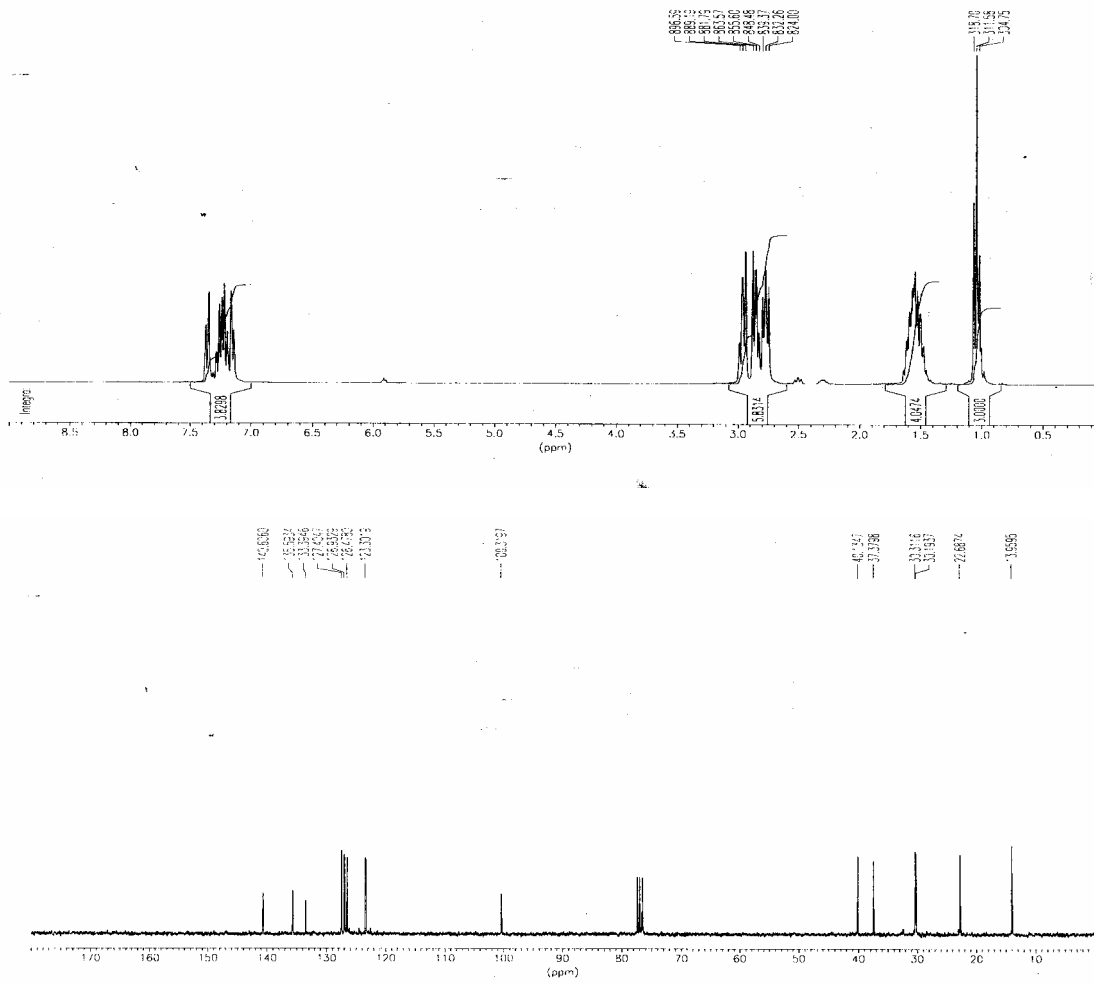

2n

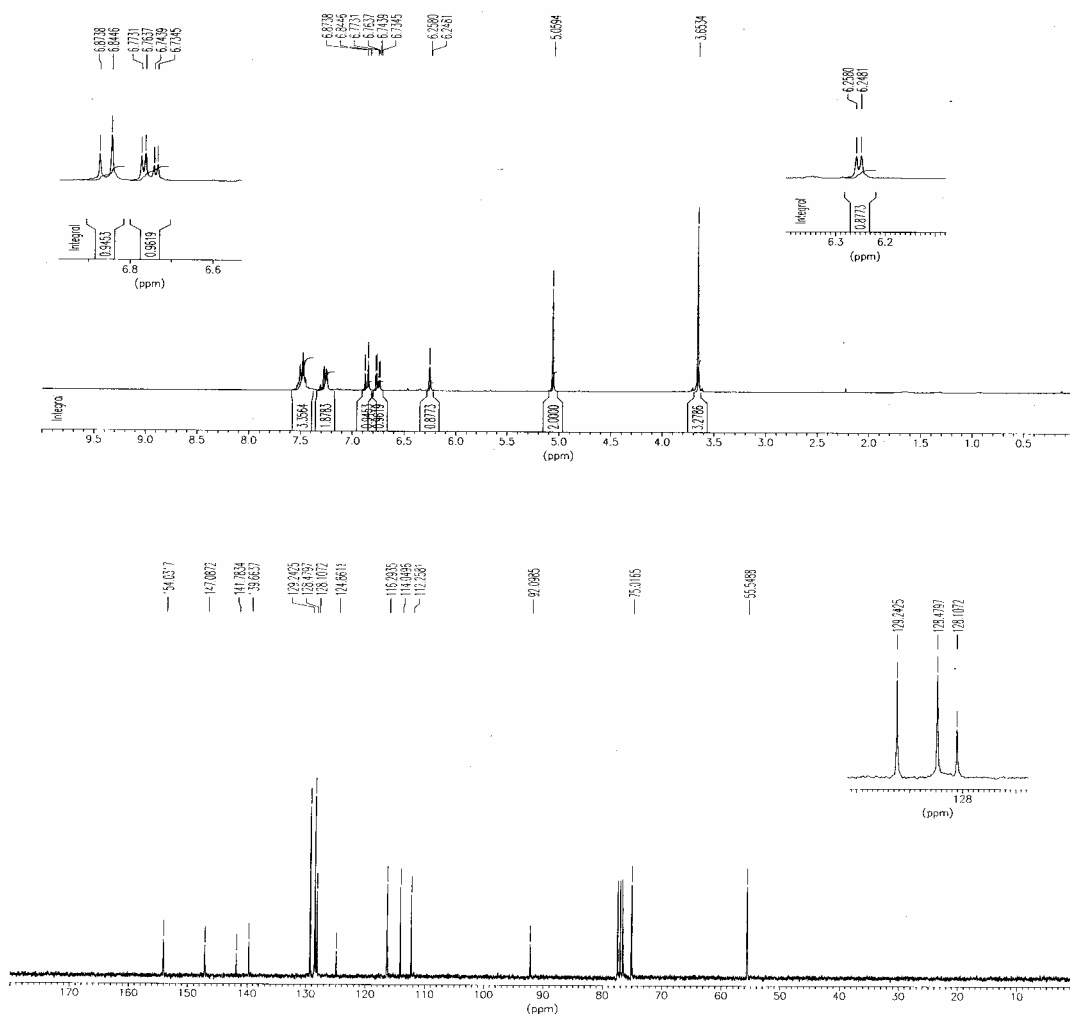

Supplement: b500303b.pdf [file b500303b.pdf]
